# Supplementary material
Source: PubMed Central journal article supplement (PMC4652117)
Supplement: JCM.02012-15_zjm999094616so1.pdf [file JCM.02012-15_zjm999094616so1.pdf]

Supplementary Table 1 - Variants found for RG74 clinical isolate.

| Strain | Chromosome | Position | Reference allele    | Mutated allele | Affected ORF           | Type  | Impact                | Codon Change | Mutation |
|--------|------------|----------|---------------------|----------------|------------------------|-------|-----------------------|--------------|----------|
| RG74   | AL123456_3 | 1977     | A                   | G              | none                   | SNP   | INTERGENIC            |              |          |
| RG74   | AL123456_3 | 4013     | T                   | C              | Rv0003                 | SNP   | NON_SYNONYMOUS_CODING | aTc/aCc      | I245T    |
| RG74   | AL123456_3 | 7362     | G                   | C              | Rv0006                 | SNP   | NON_SYNONYMOUS_CODING | Gag/Cag      | E21Q     |
| RG74   | AL123456_3 | 7585     | G                   | C              | Rv0006                 | SNP   | NON_SYNONYMOUS_CODING | aGc/aCc      | S95T     |
| RG74   | AL123456_3 | 8040     | G                   | A              | Rv0006                 | SNP   | NON_SYNONYMOUS_CODING | Ggc/Agc      | G247S    |
| RG74   | AL123456_3 | 9304     | G                   | A              | Rv0006                 | SNP   | NON_SYNONYMOUS_CODING | ggC/gAc      | G668D    |
| RG74   | AL123456_3 | 11879    | A                   | G              | Rv0008c                | SNP   | NON_SYNONYMOUS_CODING | Tcc/Ccc      | S145P    |
| RG74   | AL123456_3 | 14251    | G                   | A              | Rv0012                 | SNP   | NON_SYNONYMOUS_CODING | Gat/Aat      | D55N     |
| RG74   | AL123456_3 | 14785    | T                   | C              | Rv0012                 | SNP   | NON_SYNONYMOUS_CODING | Tgc/Cgc      | C233R    |
| RG74   | AL123456_3 | 17608    | G                   | C              | Rv0015c                | SNP   | NON_SYNONYMOUS_CODING | agC/agG      | S385R    |
| RG74   | AL123456_3 | 21795    | G                   | A              | Rv0018c                | SNP   | NON_SYNONYMOUS_CODING | Ccg/Tcg      | P463S    |
| RG74   | AL123456_3 | 26959    | C                   | G              | none                   | SNP   | INTERGENIC            |              |          |
| RG74   | AL123456_3 | 30754    | A                   | G              | Rv0026                 | SNP   | NON_SYNONYMOUS_CODING | Aag/Gag      | K345E    |
| RG74   | AL123456_3 | 33457    | C                   | T              | Rv0030                 | SNP   | SYNONYMOUS_CODING     | caC/caT      | H78      |
| RG74   | AL123456_3 | 33551    | T                   | G              | Rv0030                 | SNP   | STOP_LOST             | Tga/Gga      | *110G    |
| RG74   | AL123456_3 | 34044    | T                   | C              | none                   | SNP   | INTERGENIC            |              |          |
| RG74   | AL123456_3 | 36470    | GCCCCCCC            | GCCCCCCC       | Rv0032                 | INDEL | FRAME_SHIFT           | -/C          | -728?    |
| RG74   | AL123456_3 | 37031    | C                   | G              | Rv0034                 | SNP   | SYNONYMOUS_CODING     | gcC/gcG      | A55      |
| RG74   | AL123456_3 | 37763    | G                   | C              | Rv0035                 | SNP   | NON_SYNONYMOUS_CODING | Gac/Cac      | D169H    |
| RG74   | AL123456_3 | 42967    | G                   | C              | Rv0040c                | SNP   | SYNONYMOUS_CODING     | ccC/ccG      | P133     |
| RG74   | AL123456_3 | 55553    | C                   | T              | Rv0050                 | SNP   | NON_SYNONYMOUS_CODING | Ccg/Tcg      | P631S    |
| RG74   | AL123456_3 | 62049    | A                   | G              | Rv0058                 | SNP   | NON_SYNONYMOUS_CODING | Agg/Ggg      | R552G    |
| RG74   | AL123456_3 | 63771    | C                   | T              | Rv0059                 | SNP   | NON_SYNONYMOUS_CODING | cGc/cTg      | P191L    |
| RG74   | AL123456_3 | 69989    | G                   | A              | Rv0064                 | SNP   | NON_SYNONYMOUS_CODING | gGt/gAt      | G457D    |
| RG74   | AL123456_3 | 70816    | A                   | G              | Rv0064                 | SNP   | NON_SYNONYMOUS_CODING | Aac/Gac      | N733D    |
| RG74   | AL123456_3 | 71336    | G                   | C              | Rv0064                 | SNP   | NON_SYNONYMOUS_CODING | cGc/cCc      | R906P    |
| RG74   | AL123456_3 | 71585    | CG                  | CGAG           | none                   | INDEL | INTERGENIC            |              |          |
| RG74   | AL123456_3 | 74059    | C                   | T              | Rv0066c                | SNP   | SYNONYMOUS_CODING     | aaG/aaA      | K151     |
| RG74   | AL123456_3 | 75940    | G                   | C              | Rv0068                 | SNP   | NON_SYNONYMOUS_CODING | Gtg/Ctg      | V214L    |
|        |            |          | TCGGTGGACCCGGTGGACC |                | TCGGTGGACCCGGTGGACCCG  |       |                       |              |          |
|        |            |          | CGGTGGACCCGGTGGACCC |                | GTGGACCCGGTGGACCCGGTGG |       |                       |              |          |
| RG74   | AL123456_3 | 79504    | GTTGGACCCGGTGGAC    | GAC            | Rv0071                 | INDEL | CODON_DELETION        | ccgtggac/-   | PVD22-   |
| RG74   | AL123456_3 | 80616    | C                   | G              | none                   | SNP   | INTERGENIC            |              |          |
| RG74   | AL123456_3 | 92199    | T                   | G              | Rv0083                 | SNP   | SYNONYMOUS_CODING     | acT/acG      | T600     |
| RG74   | AL123456_3 | 104941   | T                   | C              | Rv0095c                | SNP   | NON_SYNONYMOUS_CODING | cAg/cGg      | Q92R     |
| RG74   | AL123456_3 | 104944   | G                   | A              | Rv0095c                | SNP   | NON_SYNONYMOUS_CODING | GcC/gTc      | A91V     |
| RG74   | AL123456_3 | 104962   | G                   | A              | Rv0095c                | SNP   | NON_SYNONYMOUS_CODING | gCc/gTg      | A85V     |
| RG74   | AL123456_3 | 105045   | G                   | C              | Rv0095c                | SNP   | NON_SYNONYMOUS_CODING | gaC/gaG      | D57E     |
| RG74   | AL123456_3 | 116000   | T                   | G              | Rv0101                 | SNP   | SYNONYMOUS_CODING     | gtT/gtG      | V2000    |
| RG74   | AL123456_3 | 117352   | C                   | T              | Rv0101                 | SNP   | NON_SYNONYMOUS_CODING | gCg/gTg      | A2451V   |
| RG74   | AL123456_3 | 122109   | A                   | G              | Rv0103c                | SNP   | NON_SYNONYMOUS_CODING | tTg/tcG      | L225     |
| RG74   | AL123456_3 | 125830   | GAAAA               | GAAAA          | Rv0107c                | INDEL | FRAME_SHIFT           | -/T          | -1569?   |
| RG74   | AL123456_3 | 131174   | TGG                 | TGGG           | none                   | INDEL | INTERGENIC            |              |          |
| RG74   | AL123456_3 | 132417   | C                   | G              | Rv0109                 | SNP   | NON_SYNONYMOUS_CODING | Gcg/Gcg      | R346G    |
| RG74   | AL123456_3 | 133839   | C                   | T              | none                   | SNP   | INTERGENIC            |              |          |
| RG74   | AL123456_3 | 133862   | G                   | A              | none                   | SNP   | INTERGENIC            |              |          |
| RG74   | AL123456_3 | 146087   | T                   | C              | Rv0120c                | SNP   | NON_SYNONYMOUS_CODING | aAt/aGt      | N562S    |
| RG74   | AL123456_3 | 149323   | C                   | T              | none                   | SNP   | INTERGENIC            |              |          |
| RG74   | AL123456_3 | 154283   | T                   | C              | Rv0127                 | SNP   | NON_SYNONYMOUS_CODING | Tcg/Ccg      | S18P     |
| RG74   | AL123456_3 | 157292   | C                   | T              | Rv0129c                | SNP   | SYNONYMOUS_CODING     | gaG/gaA      | E103     |
| RG74   | AL123456_3 | 160214   | T                   | C              | Rv0132c                | SNP   | NON_SYNONYMOUS_CODING | tAt/tGt      | Y190C    |
| RG74   | AL123456_3 | 162581   | G                   | A              | Rv0134                 | SNP   | NON_SYNONYMOUS_CODING | Ggc/Agc      | G271S    |
| RG74   | AL123456_3 | 177857   | G                   | A              | Rv0151c                | SNP   | SYNONYMOUS_CODING     | Ctg/Ttg      | L485     |
| RG74   | AL123456_3 | 178941   | G                   | T              | Rv0151c                | SNP   | NON_SYNONYMOUS_CODING | aaC/aaA      | N123K    |
| RG74   | AL123456_3 | 180025   | C                   | T              | Rv0152c                | SNP   | NON_SYNONYMOUS_CODING | gGg/gAg      | G291E    |
| RG74   | AL123456_3 | 188800   | T                   | C              | Rv0159c                | SNP   | NON_SYNONYMOUS_CODING | Acg/Gcg      | T14A     |
| RG74   | AL123456_3 | 194681   | G                   | C              | Rv0165c                | SNP   | SYNONYMOUS_CODING     | ctC/ctG      | L45      |
|        |            |          | ATTGCCGGGACTGCCGG   |                | ATTGCCGGGG             |       |                       |              |          |
| RG74   | AL123456_3 | 194849   | GG                  | ATTGCCGGGG     | none                   | INDEL | INTERGENIC            |              |          |
| RG74   | AL123456_3 | 196517   | G                   | T              | Rv0166                 | SNP   | NON_SYNONYMOUS_CODING | Gtg/Ttg      | V509L    |
| RG74   | AL123456_3 | 196642   | C                   | T              | Rv0166                 | SNP   | SYNONYMOUS_CODING     | aaC/aaT      | N550     |
| RG74   | AL123456_3 | 199390   | C                   | G              | Rv0169                 | SNP   | NON_SYNONYMOUS_CODING | aCc/aGc      | T286S    |
| RG74   | AL123456_3 | 202774   | A                   | G              | Rv0172                 | SNP   | NON_SYNONYMOUS_CODING | aAt/aGt      | N100S    |
| RG74   | AL123456_3 | 203269   | C                   | T              | Rv0172                 | SNP   | NON_SYNONYMOUS_CODING | gCc/gTg      | A265V    |
| RG74   | AL123456_3 | 206339   | T                   | C              | Rv0174                 | SNP   | NON_SYNONYMOUS_CODING | ctG/cCg      | L370P    |
| RG74   | AL123456_3 | 207226   | T                   | C              | Rv0175                 | SNP   | NON_SYNONYMOUS_CODING | aTg/aCg      | M138T    |
| RG74   | AL123456_3 | 209462   | C                   | T              | Rv0178                 | SNP   | SYNONYMOUS_CODING     | acC/aCt      | T175     |
| RG74   | AL123456_3 | 211192   | T                   | C              | Rv0180c                | SNP   | SYNONYMOUS_CODING     | gaA/gaG      | E353     |
| RG74   | AL123456_3 | 211800   | C                   | T              | Rv0180c                | SNP   | NON_SYNONYMOUS_CODING | Gct/Act      | A151T    |
| RG74   | AL123456_3 | 212353   | C                   | T              | Rv0181c                | SNP   | NON_SYNONYMOUS_CODING | ccC/cAc      | R220H    |
| RG74   | AL123456_3 | 216982   | C                   | T              | Rv0186                 | SNP   | SYNONYMOUS_CODING     | ccC/ccT      | P238     |
| RG74   | AL123456_3 | 223942   | T                   | C              | Rv0192                 | SNP   | NON_SYNONYMOUS_CODING | Tcg/Ccg      | S127P    |
| RG74   | AL123456_3 | 225323   | T                   | C              | Rv0193c                | SNP   | NON_SYNONYMOUS_CODING | Aag/Gag      | K417E    |
| RG74   | AL123456_3 | 227098   | T                   | C              | Rv0194                 | SNP   | NON_SYNONYMOUS_CODING | aTg/aCg      | M74T     |
| RG74   | AL123456_3 | 231114   | C                   | G              | Rv0195                 | SNP   | SYNONYMOUS_CODING     | gcC/gcG      | A72      |
| RG74   | AL123456_3 | 234477   | T                   | G              | Rv0197                 | SNP   | STOP_GAINED           | taT/taG      | Y749*    |
| RG74   | AL123456_3 | 234496   | C                   | CGT            | Rv0197                 | INDEL | FRAME_SHIFT           | -/GT         | -756?    |
| RG74   | AL123456_3 | 247749   | A                   | G              | Rv0207c                | SNP   | NON_SYNONYMOUS_CODING | Ttc/Ctc      | F122L    |
| RG74   | AL123456_3 | 248539   | A                   | G              | Rv0208c                | SNP   | NON_SYNONYMOUS_CODING | gTg/gCg      | V123A    |
| RG74   | AL123456_3 | 25323    | G                   | A              | Rv0213c                | SNP   | SYNONYMOUS_CODING     | Ctg/Ttg      | L210     |
| RG74   | AL123456_3 | 261869   | T                   | C              | Rv0218                 | SNP   | NON_SYNONYMOUS_CODING | Tgt/Cgt      | C316R    |
| RG74   | AL123456_3 | 265554   | A                   | C              | Rv0222                 | SNP   | SYNONYMOUS_CODING     | gtA/gtC      | V16      |
| RG74   | AL123456_3 | 274683   | T                   | G              | Rv0229c                | SNP   | NON_SYNONYMOUS_CODING | Aaa/Caa      | K102Q    |
| RG74   | AL123456_3 | 278681   | C                   | G              | Rv0233                 | SNP   | NON_SYNONYMOUS_CODING | Cat/Gat      | H33D     |
| RG74   | AL123456_3 | 283614   | T                   | C              | Rv0236c                | SNP   | NON_SYNONYMOUS_CODING | Agc/Ggc      | S1080G   |
| RG74   | AL123456_3 | 285772   | A                   | C              | Rv0236c                | SNP   | SYNONYMOUS_CODING     | ccT/ccG      | P360     |
| RG74   | AL123456_3 | 285871   | A                   | G              | Rv0236c                | SNP   | SYNONYMOUS_CODING     | gtT/gtC      | V327     |
| RG74   | AL123456_3 | 290055   | C                   | G,A            | Rv0241c                | SNP   | SYNONYMOUS_CODING     | gcG/gcC      | A200     |
| RG74   | AL123456_3 | 292261   | G                   | A              | Rv0243                 | SNP   | NON_SYNONYMOUS_CODING | Gcc/Acc      | A31T     |
| RG74   | AL123456_3 | 293704   | CTTTTT              | CTTTT          | none                   | INDEL | INTERGENIC            |              |          |
| RG74   | AL123456_3 | 310973   | G                   | A              | Rv0259c                | SNP   | NON_SYNONYMOUS_CODING | gCg/gTg      | A182V    |
| RG74   | AL123456_3 | 311613   | G                   | T              | Rv0260c                | SNP   | SYNONYMOUS_CODING     | gtC/gtA      | V349     |
| RG74   | AL123456_3 | 315755   | C                   | G              | Rv0263c                | SNP   | SYNONYMOUS_CODING     | ctG/ctC      | L4       |
| RG74   | AL123456_3 | 316129   | C                   | G              | Rv0264c                | SNP   | NON_SYNONYMOUS_CODING | gGc/gCc      | G96A     |
| RG74   | AL123456_3 | 328219   | G                   | A              | Rv0271c                | SNP   | SYNONYMOUS_CODING     | ggC/ggT      | G81      |
| RG74   | AL123456_3 | 331759   | G                   | T              | Rv0276                 | SNP   | SYNONYMOUS_CODING     | tcG/tcT      | S4       |
| RG74   | AL123456_3 | 335956   | C                   | T              | Rv0278c                | SNP   | NON_SYNONYMOUS_CODING | Gcc/Acc      | A119T    |
| RG74   | AL123456_3 | 336698   | C                   | G              | Rv0279c                | SNP   | SYNONYMOUS_CODING     | ggG/ggC      | G792     |

|      |            |                          |                       |         |       |                       |                            |           |
|------|------------|--------------------------|-----------------------|---------|-------|-----------------------|----------------------------|-----------|
| RG74 | AL123456_3 | 336701 A                 | G                     | Rv0279c | SNP   | SYNONYMOUS_CODING     | ggT/ggC                    | G791      |
| RG74 | AL123456_3 | 337820 G                 | A                     | Rv0279c | SNP   | SYNONYMOUS_CODING     | ggC/ggT                    | G418      |
| RG74 | AL123456_3 | 338100 T                 | C                     | Rv0279c | SNP   | NON_SYNONYMOUS_CODING | aAc/aGc                    | N325S     |
| RG74 | AL123456_3 | 338876 G                 | A                     | Rv0279c | SNP   | SYNONYMOUS_CODING     | agC/agT                    | S66       |
| RG74 | AL123456_3 | 338960 T                 | C                     | Rv0279c | SNP   | SYNONYMOUS_CODING     | gcA/gcG                    | A38       |
| RG74 | AL123456_3 | 340372 T                 | C                     | Rv0280  | SNP   | NON_SYNONYMOUS_CODING | TcG/CcG                    | S337P     |
| RG74 | AL123456_3 | 346275 C                 | G                     | Rv0284  | SNP   | NON_SYNONYMOUS_CODING | cG/cGg                     | P214R     |
| RG74 | AL123456_3 | 356528 A                 | G                     | Rv0292  | SNP   | NON_SYNONYMOUS_CODING | Aat/Gat                    | N217D     |
| RG74 | AL123456_3 | 366088 A                 | G                     | Rv0303  | SNP   | SYNONYMOUS_CODING     | gcA/gcG                    | A285      |
| RG74 | AL123456_3 | 373282 TAA               | TA                    | Rv0305c | INDEL | FRAME_SHIFT           | -                          | -810      |
| RG74 | AL123456_3 | 376774 T                 | C                     | Rv0307c | SNP   | SYNONYMOUS_CODING     | gcA/gcG                    | A94       |
| RG74 | AL123456_3 | 384380 A                 | C                     | Rv0315  | SNP   | NON_SYNONYMOUS_CODING | aAg/aGc                    | K260T     |
| RG74 | AL123456_3 | 386432 C                 | G                     | Rv0318c | SNP   | NON_SYNONYMOUS_CODING | gGg/gcG                    | G223A     |
| RG74 | AL123456_3 | 387353 G                 | A                     | Rv0319  | SNP   | NON_SYNONYMOUS_CODING | gGc/gAc                    | G69D      |
| RG74 | AL123456_3 | 390828 T                 | C                     | Rv0323c | SNP   | NON_SYNONYMOUS_CODING | AgT/Ggt                    | S142G     |
| RG74 | AL123456_3 | 401678 C                 | A                     | Rv0336  | SNP   | NON_SYNONYMOUS_CODING | cCc/cAc                    | P496H     |
| RG74 | AL123456_3 | 403364 G                 | A                     | Rv0338c | SNP   | SYNONYMOUS_CODING     | ccC/ccT                    | P826      |
| RG74 | AL123456_3 | 403920 C                 | T                     | Rv0338c | SNP   | NON_SYNONYMOUS_CODING | cGc/cAc                    | R641H     |
| RG74 | AL123456_3 | 403980 G                 | A                     | Rv0338c | SNP   | NON_SYNONYMOUS_CODING | gCc/gtC                    | A621V     |
| RG74 | AL123456_3 | 404326 T                 | C                     | Rv0338c | SNP   | NON_SYNONYMOUS_CODING | Agg/Ggg                    | R506G     |
| RG74 | AL123456_3 | 408723 C                 | T                     | Rv0340  | SNP   | SYNONYMOUS_CODING     | atC/atT                    | I30       |
| RG74 | AL123456_3 | 414486 C                 | T                     | Rv0344c | SNP   | SYNONYMOUS_CODING     | gaG/gaA                    | E152      |
| RG74 | AL123456_3 | 420008 A                 | G                     | Rv0350  | SNP   | SYNONYMOUS_CODING     | gcA/gcG                    | A58       |
|      |            | TTGCCGAGGTTTGCACTGCC     |                       |         |       |                       |                            |           |
|      |            | GAGGTTTGCACTGCCGAGG      | TTGCCGAGGTTTGCACTGCCG |         |       |                       |                            |           |
|      |            | TTTGCACTGCCGAGGTTTG      | AGGTTTGCACTGCCGAGGTTT |         |       |                       |                            |           |
| RG74 | AL123456_3 | 427310 ACTGCC            | GCACTGCC              | Rv0355c | INDEL | CODON_DELETION        | ggcagtccaacctc/-           | GSANL243I |
|      |            | CGTCGCGGTGTTGTAGAA       |                       |         |       |                       |                            |           |
|      |            | GCCGGTGTGAGTCGCCG        | CGTCGCGGTGTTGTAGAAGC  |         |       |                       |                            |           |
| RG74 | AL123456_3 | 428109 GTGTTGTAGAAGCCGGT | CGGT                  | Rv0355c | INDEL | CODON_DELETION        | accggcttcacaaccgg.TGFYNTGD |           |
| RG74 | AL123456_3 | 435553 C                 | T                     | Rv0357c | SNP   | NON_SYNONYMOUS_CODING | gGa/gAa                    | G406E     |
| RG74 | AL123456_3 | 44351 G                  | T                     | Rv0366c | SNP   | NON_SYNONYMOUS_CODING | aaC/aaA                    | N155K     |
| RG74 | AL123456_3 | 446786 G                 | A                     | Rv0369c | SNP   | SYNONYMOUS_CODING     | ggC/ggT                    | G87       |
| RG74 | AL123456_3 | 454295 T                 | C                     | Rv0376c | SNP   | SYNONYMOUS_CODING     | ccA/ccG                    | P26       |
| RG74 | AL123456_3 | 457452 T                 | G                     | Rv0381c | SNP   | SYNONYMOUS_CODING     | acA/acC                    | T124      |
| RG74 | AL123456_3 | 459399 A                 | C                     | none    | SNP   | INTERGENIC            |                            |           |
| RG74 | AL123456_3 | 460423 A                 | G                     | Rv0384c | SNP   | NON_SYNONYMOUS_CODING | gTg/gcG                    | V527A     |
| RG74 | AL123456_3 | 467497 CGGG              | CGGGG                 | Rv0388c | INDEL | FRAME_SHIFT           | -/C                        | -167?     |
| RG74 | AL123456_3 | 467516 G                 | C                     | Rv0388c | SNP   | SYNONYMOUS_CODING     | tcC/tcG                    | S162      |
| RG74 | AL123456_3 | 467526 C                 | G                     | Rv0388c | SNP   | NON_SYNONYMOUS_CODING | gGg/gcG                    | G159A     |
| RG74 | AL123456_3 | 467546 G                 | C                     | Rv0388c | SNP   | NON_SYNONYMOUS_CODING | gaC/gaG                    | D152E     |
| RG74 | AL123456_3 | 467557 A                 | C                     | Rv0388c | SNP   | NON_SYNONYMOUS_CODING | TtG/Gtg                    | L149V     |
| RG74 | AL123456_3 | 467564 A                 | C                     | Rv0388c | SNP   | NON_SYNONYMOUS_CODING | caT/caG                    | H146Q     |
| RG74 | AL123456_3 | 467585 G                 | C                     | Rv0388c | SNP   | NON_SYNONYMOUS_CODING | caC/cag                    | H139Q     |
| RG74 | AL123456_3 | 467590 T                 | C                     | Rv0388c | SNP   | NON_SYNONYMOUS_CODING | AGC/GcG                    | T138A     |
| RG74 | AL123456_3 | 467621 T                 | G                     | Rv0388c | SNP   | SYNONYMOUS_CODING     | ggA/ggC                    | G127      |
| RG74 | AL123456_3 | 467638 G                 | T                     | Rv0388c | SNP   | NON_SYNONYMOUS_CODING | Cag/AaG                    | Q122K     |
| RG74 | AL123456_3 | 471621 C                 | T                     | Rv0392c | SNP   | NON_SYNONYMOUS_CODING | gGg/gAg                    | G340E     |
| RG74 | AL123456_3 | 472705 T                 | C                     | none    | SNP   | INTERGENIC            |                            |           |
| RG74 | AL123456_3 | 475178 T                 | C                     | Rv0395  | SNP   | NON_SYNONYMOUS_CODING | gTc/gCc                    | V80A      |
| RG74 | AL123456_3 | 479632 G                 | T                     | Rv0400c | SNP   | NON_SYNONYMOUS_CODING | aCc/aAc                    | T41N      |
| RG74 | AL123456_3 | 489416 G                 | C                     | Rv0405  | SNP   | NON_SYNONYMOUS_CODING | gGc/gcG                    | G1229A    |
| RG74 | AL123456_3 | 489935 G                 | C                     | Rv0406c | SNP   | NON_SYNONYMOUS_CODING | cGg/cGc                    | R1402P    |
| RG74 | AL123456_3 | 497129 G                 | T                     | Rv0410c | SNP   | SYNONYMOUS_CODING     | gcC/gcA                    | A62       |
| RG74 | AL123456_3 | 498557 C                 | A                     | Rv0412c | SNP   | NON_SYNONYMOUS_CODING | Gac/Tac                    | D355Y     |
| RG74 | AL123456_3 | 499798 G                 | A                     | Rv0413  | SNP   | STOP_GAINED           | tGg/tAg                    | W29*      |
| RG74 | AL123456_3 | 502589 C                 | G                     | Rv0417  | SNP   | NON_SYNONYMOUS_CODING | tcC/tGc                    | S75C      |
| RG74 | AL123456_3 | 503354 G                 | C                     | none    | SNP   | INTERGENIC            |                            |           |
| RG74 | AL123456_3 | 513257 T                 | C                     | Rv0425c | SNP   | NON_SYNONYMOUS_CODING | Atg/Gtg                    | M689V     |
| RG74 | AL123456_3 | 534691 C                 | T                     | Rv0446c | SNP   | STOP_GAINED           | tgG/tgA                    | W175*     |
| RG74 | AL123456_3 | 535695 C                 | T                     | Rv0447c | SNP   | SYNONYMOUS_CODING     | ggG/ggA                    | G271      |
| RG74 | AL123456_3 | 541201 A                 | G                     | Rv0450c | SNP   | SYNONYMOUS_CODING     | ctT/ctC                    | L97       |
| RG74 | AL123456_3 | 546827 C                 | T                     | none    | SNP   | INTERGENIC            |                            |           |
| RG74 | AL123456_3 | 551525 A                 | C                     | Rv0459  | SNP   | SYNONYMOUS_CODING     | Aga/Cga                    | R110      |
| RG74 | AL123456_3 | 556428 T                 | C                     | none    | SNP   | INTERGENIC            |                            |           |
| RG74 | AL123456_3 | 558501 C                 | T                     | Rv0467  | SNP   | SYNONYMOUS_CODING     | gaC/gaT                    | D325      |
| RG74 | AL123456_3 | 563420 T                 | C                     | Rv0472c | SNP   | NON_SYNONYMOUS_CODING | gAg/gGg                    | E3G       |
| RG74 | AL123456_3 | 573262 A                 | G                     | Rv0484c | SNP   | SYNONYMOUS_CODING     | ggT/ggC                    | G180      |
|      |            | GGGGGCACCCCGCTTGC        |                       |         |       |                       |                            |           |
| RG74 | AL123456_3 | 580773 GGGGGAG           | GG                    | none    | INDEL | INTERGENIC            |                            |           |
| RG74 | AL123456_3 | 584438 G                 | A                     | Rv0493c | SNP   | NON_SYNONYMOUS_CODING | Ccc/Tcc                    | P855      |
| RG74 | AL123456_3 | 589536 G                 | A                     | Rv0499  | SNP   | SYNONYMOUS_CODING     | ctG/cta                    | L118      |
| RG74 | AL123456_3 | 590436 T                 | C                     | Rv0500  | SNP   | SYNONYMOUS_CODING     | gcT/gcC                    | A118      |
| RG74 | AL123456_3 | 595192 G                 | A                     | Rv0504c | SNP   | SYNONYMOUS_CODING     | gaC/gaT                    | D37       |
| RG74 | AL123456_3 | 597816 A                 | G                     | Rv0507  | SNP   | SYNONYMOUS_CODING     | gcA/gcG                    | A206      |
| RG74 | AL123456_3 | 598475 G                 | A                     | Rv0507  | SNP   | NON_SYNONYMOUS_CODING | cGc/cAc                    | R426H     |
| RG74 | AL123456_3 | 603122 C                 | T                     | Rv0511  | SNP   | SYNONYMOUS_CODING     | CtG/TtG                    | L102      |
| RG74 | AL123456_3 | 610120 T                 | G                     | none    | SNP   | INTERGENIC            |                            |           |
| RG74 | AL123456_3 | 623472 A                 | G                     | Rv0532  | SNP   | NON_SYNONYMOUS_CODING | gAc/gGc                    | D227G     |
| RG74 | AL123456_3 | 623508 C                 | G                     | Rv0532  | SNP   | NON_SYNONYMOUS_CODING | gCc/gcG                    | A239G     |
| RG74 | AL123456_3 | 637319 G                 | A                     | Rv0545c | SNP   | NON_SYNONYMOUS_CODING | Cct/Tct                    | P495      |
| RG74 | AL123456_3 | 637922 C                 | T                     | Rv0546c | SNP   | SYNONYMOUS_CODING     | caG/caA                    | Q16       |
| RG74 | AL123456_3 | 648002 T                 | G                     | Rv0556  | SNP   | NON_SYNONYMOUS_CODING | cTc/cGc                    | L15R      |
| RG74 | AL123456_3 | 664249 C                 | T                     | Rv0571c | SNP   | SYNONYMOUS_CODING     | caG/caA                    | Q190      |
| RG74 | AL123456_3 | 665293 A                 | G                     | Rv0572c | SNP   | NON_SYNONYMOUS_CODING | Ttc/Ctc                    | F31L      |
| RG74 | AL123456_3 | 669398 T                 | C                     | Rv0575c | SNP   | SYNONYMOUS_CODING     | caA/caG                    | Q116      |
| RG74 | AL123456_3 | 671876 G                 | A                     | Rv0577  | SNP   | SYNONYMOUS_CODING     | tcG/tcA                    | S237      |
| RG74 | AL123456_3 | 672491 C                 | G                     | Rv0578c | SNP   | SYNONYMOUS_CODING     | ggG/ggC                    | G1142     |
| RG74 | AL123456_3 | 673238 A                 | G                     | Rv0578c | SNP   | SYNONYMOUS_CODING     | caT/caC                    | H893      |
| RG74 | AL123456_3 | 675673 C                 | T                     | Rv0578c | SNP   | NON_SYNONYMOUS_CODING | Gcc/Acc                    | A82T      |
| RG74 | AL123456_3 | 682903 A                 | G                     | Rv0585c | SNP   | NON_SYNONYMOUS_CODING | aTa/aCa                    | I457T     |
| RG74 | AL123456_3 | 685461 C                 | G                     | Rv0587  | SNP   | SYNONYMOUS_CODING     | gcC/gcG                    | A111      |
| RG74 | AL123456_3 | 685608 T                 | C                     | Rv0587  | SNP   | SYNONYMOUS_CODING     | ctT/ctC                    | L160      |
| RG74 | AL123456_3 | 686972 T                 | C                     | Rv0589  | SNP   | NON_SYNONYMOUS_CODING | tTc/tCc                    | F515      |
| RG74 | AL123456_3 | 690465 T                 | G                     | Rv0591  | SNP   | SYNONYMOUS_CODING     | ctT/ctG                    | L469      |
| RG74 | AL123456_3 | 698968 G                 | A                     | Rv0601c | SNP   | SYNONYMOUS_CODING     | ggC/ggT                    | G9        |
| RG74 | AL123456_3 | 709226 G                 | A                     | Rv0613c | SNP   | NON_SYNONYMOUS_CODING | acC/aTc                    | T97I      |
| RG74 | AL123456_3 | 726703 C                 | A                     | Rv0631c | SNP   | NON_SYNONYMOUS_CODING | aGg/aTg                    | R535M     |
| RG74 | AL123456_3 | 731027 T                 | C                     | Rv0634c | SNP   | NON_SYNONYMOUS_CODING | Aag/Gag                    | K3E       |
| RG74 | AL123456_3 | 736710 T                 | C                     | Rv0642c | SNP   | NON_SYNONYMOUS_CODING | aaC/aGc                    | N165S     |









|                       |            |         |        |               |         |       |                       |                              |         |
|-----------------------|------------|---------|--------|---------------|---------|-------|-----------------------|------------------------------|---------|
| RG74                  | AL123456_3 | 2612632 | C      | A             | Rv2337c | SNP   | NON_SYNONYMOUS_CODING | gGc/gTc                      | G119V   |
| RG74                  | AL123456_3 | 2621058 | G      | A             | Rv2343c | SNP   | SYNONYMOUS_CODING     | ccC/ccT                      | P465    |
| RG74                  | AL123456_3 | 2641556 | A      | C             | Rv2358  | SNP   | NON_SYNONYMOUS_CODING | gAg/gCg                      | E104A   |
| RG74                  | AL123456_3 | 2654371 | G      | A             | Rv2374c | SNP   | SYNONYMOUS_CODING     | aaC/aaT                      | N241    |
| RG74                  | AL123456_3 | 2656225 | A      | G             | Rv2377c | SNP   | NON_SYNONYMOUS_CODING | gTc/gCc                      | V69A    |
| RG74                  | AL123456_3 | 2660319 | C      | G             | Rv2379c | SNP   | NON_SYNONYMOUS_CODING | gaG/gaC                      | E589D   |
| RG74                  | AL123456_3 | 2680658 | T      | G             | none    | SNP   | INTERGENIC            |                              |         |
| RG74                  | AL123456_3 | 2683137 | G      | A             | Rv2388c | SNP   | SYNONYMOUS_CODING     | ccC/ccT                      | P2      |
| RG74                  | AL123456_3 | 2695378 | C      | G             | Rv2398c | SNP   | NON_SYNONYMOUS_CODING | gGc/gCc                      | G141A   |
| ACAGCGACCATATCGCCGAGC |            |         |        |               |         |       |                       |                              |         |
| RG74                  | AL123456_3 | 2704884 | AC     | TC            | Rv2407  | INDEL | CODON_INSERTION       | -/AGCGACCATATCGC(-64SDHIAEI) |         |
| RG74                  | AL123456_3 | 2713795 | C      | T             | none    | SNP   | INTERGENIC            |                              |         |
| RG74                  | AL123456_3 | 2718852 | T      | G             | none    | SNP   | INTERGENIC            |                              |         |
| RG74                  | AL123456_3 | 2721013 | A      | G             | Rv2424c | SNP   | SYNONYMOUS_CODING     | cgT/cgC                      | R255    |
| RG74                  | AL123456_3 | 2734074 | T      | C             | Rv2436  | SNP   | NON_SYNONYMOUS_CODING | gTc/gCc                      | V282A   |
| RG74                  | AL123456_3 | 2736434 | C      | A             | Rv2438c | SNP   | NON_SYNONYMOUS_CODING | cGg/cTg                      | R133L   |
| RG74                  | AL123456_3 | 2745041 | G      | T             | none    | SNP   | INTERGENIC            |                              |         |
| RG74                  | AL123456_3 | 2745889 | C      | T             | Rv2446c | SNP   | NON_SYNONYMOUS_CODING | Gcc/Acc                      | A84T    |
| RG74                  | AL123456_3 | 2751804 | C      | T             | Rv2450c | SNP   | NON_SYNONYMOUS_CODING | cGg/cAg                      | R126Q   |
| RG74                  | AL123456_3 | 2752698 | C      | A             | none    | SNP   | INTERGENIC            |                              |         |
| RG74                  | AL123456_3 | 2760152 | A      | G             | Rv2458  | SNP   | NON_SYNONYMOUS_CODING | tAc/tGc                      | Y125C   |
| RG74                  | AL123456_3 | 2779136 | T      | C             | Rv2476c | SNP   | NON_SYNONYMOUS_CODING | Agc/Ggc                      | S1043G  |
| RG74                  | AL123456_3 | 2786952 | A      | G             | Rv2482c | SNP   | NON_SYNONYMOUS_CODING | TgC/CgC                      | C778R   |
| RG74                  | AL123456_3 | 2809362 | G      | T             | Rv2495c | SNP   | NON_SYNONYMOUS_CODING | GcC/gAc                      | A193D   |
| RG74                  | AL123456_3 | 2809621 | T      | C             | Rv2495c | SNP   | NON_SYNONYMOUS_CODING | Acc/Gcc                      | T107A   |
| RG74                  | AL123456_3 | 2814961 | G      | A             | Rv2501c | SNP   | SYNONYMOUS_CODING     | ggC/ggT                      | G640    |
| RG74                  | AL123456_3 | 2818837 | A      | G             | Rv2503c | SNP   | SYNONYMOUS_CODING     | ggT/ggC                      | G97     |
| RG74                  | AL123456_3 | 2820548 | C      | T             | Rv2505c | SNP   | NON_SYNONYMOUS_CODING | cGc/cAc                      | R350H   |
| RG74                  | AL123456_3 | 2821342 | C      | T             | Rv2505c | SNP   | SYNONYMOUS_CODING     | gcG/gcA                      | A85     |
| RG74                  | AL123456_3 | 2827984 | G      | T             | none    | SNP   | INTERGENIC            |                              |         |
| RG74                  | AL123456_3 | 2828019 | T      | C             | none    | SNP   | INTERGENIC            |                              |         |
| RG74                  | AL123456_3 | 2830525 | C      | A             | Rv2513  | SNP   | NON_SYNONYMOUS_CODING | aCg/aAg                      | T122K   |
| RG74                  | AL123456_3 | 2839983 | G      | A             | none    | SNP   | INTERGENIC            |                              |         |
| RG74                  | AL123456_3 | 2844132 | G      | T             | Rv2524c | SNP   | NON_SYNONYMOUS_CODING | cCg/cAg                      | P1734Q  |
| RG74                  | AL123456_3 | 2855259 | A      | G             | Rv2531c | SNP   | SYNONYMOUS_CODING     | gcT/gcC                      | A841    |
| RG74                  | AL123456_3 | 2858835 | G      | A             | Rv2534c | SNP   | SYNONYMOUS_CODING     | gcC/gcT                      | A152    |
| RG74                  | AL123456_3 | 2865760 | A      | G             | Rv2542  | SNP   | NON_SYNONYMOUS_CODING | Acc/Gcc                      | T211A   |
| RG74                  | AL123456_3 | 2865882 | T      | C             | Rv2542  | SNP   | SYNONYMOUS_CODING     | gtT/gtC                      | V251    |
| RG74                  | AL123456_3 | 2871048 | C      | T             | Rv2551c | SNP   | SYNONYMOUS_CODING     | ctG/cta                      | L49     |
| RG74                  | AL123456_3 | 2877399 | G      | A             | Rv2557  | SNP   | NON_SYNONYMOUS_CODING | GcG/cAc                      | A110T   |
| RG74                  | AL123456_3 | 2880702 | G      | C             | Rv2560  | SNP   | NON_SYNONYMOUS_CODING | Gtc/Ctc                      | V210L   |
| RG74                  | AL123456_3 | 2881455 | A      | G             | Rv2561  | SNP   | NON_SYNONYMOUS_CODING | tAc/tGc                      | Y16C    |
| RG74                  | AL123456_3 | 2881631 | GCCCCC | GCCCCC        | Rv2561  | INDEL | FRAME_SHIFT           | -                            | -76     |
| RG74                  | AL123456_3 | 2885649 | G      | T             | Rv2565  | SNP   | NON_SYNONYMOUS_CODING | Gct/Tct                      | A347S   |
| RG74                  | AL123456_3 | 2888201 | T      | C             | Rv2566  | SNP   | NON_SYNONYMOUS_CODING | cTc/cCc                      | L610P   |
| RG74                  | AL123456_3 | 2889633 | T      | C             | Rv2566  | SNP   | SYNONYMOUS_CODING     | gcT/gcC                      | A1087   |
| RG74                  | AL123456_3 | 2891267 | C      | T             | Rv2567  | SNP   | SYNONYMOUS_CODING     | ggC/ggT                      | G491    |
| RG74                  | AL123456_3 | 2891728 | A      | G             | Rv2567  | SNP   | NON_SYNONYMOUS_CODING | cAg/cGg                      | Q645R   |
| RG74                  | AL123456_3 | 2893238 | C      | A             | Rv2568c | SNP   | SYNONYMOUS_CODING     | cgG/cgT                      | R78     |
| RG74                  | AL123456_3 | 2894208 | G      | A             | Rv2569c | SNP   | SYNONYMOUS_CODING     | agC/agT                      | S67     |
| RG74                  | AL123456_3 | 2910461 | G      | T             | Rv2584c | SNP   | NON_SYNONYMOUS_CODING | CgG/gAg                      | A147E   |
| RG74                  | AL123456_3 | 2911293 | C      | G             | Rv2585c | SNP   | NON_SYNONYMOUS_CODING | tGt/tCt                      | C462S   |
| RG74                  | AL123456_3 | 2912294 | T      | G             | Rv2585c | SNP   | SYNONYMOUS_CODING     | gAc/gcC                      | A128    |
| RG74                  | AL123456_3 | 2923391 | T      | C             | Rv2592c | SNP   | SYNONYMOUS_CODING     | ccA/ccG                      | P281    |
| RG74                  | AL123456_3 | 2927939 | T      | C             | none    | SNP   | INTERGENIC            |                              |         |
| RG74                  | AL123456_3 | 2939373 | G      | C             | Rv2611c | SNP   | NON_SYNONYMOUS_CODING | tCt/tGt                      | S197C   |
| RG74                  | AL123456_3 | 2939657 | T      | C             | Rv2611c | SNP   | NON_SYNONYMOUS_CODING | atA/atG                      | I102M   |
| RG74                  | AL123456_3 | 2954439 | T      | C             | Rv2627c | SNP   | NON_SYNONYMOUS_CODING | AgA/GgA                      | R104G   |
| RG74                  | AL123456_3 | 2960231 | G      | T             | Rv2634c | SNP   | SYNONYMOUS_CODING     | ggC/ggA                      | G737    |
| RG74                  | AL123456_3 | 2968913 | T      | C             | none    | SNP   | INTERGENIC            |                              |         |
| RG74                  | AL123456_3 | 2972108 | G      | A             | none    | SNP   | INTERGENIC            |                              |         |
| RG74                  | AL123456_3 | 2973463 | ATC    | ATCTTC        | none    | INDEL | INTERGENIC            |                              |         |
| RG74                  | AL123456_3 | 2974933 | A      | G             | Rv2650c | SNP   | NON_SYNONYMOUS_CODING | aTc/aCc                      | I101T   |
| RG74                  | AL123456_3 | 2976313 | A      | G             | Rv2652c | SNP   | NON_SYNONYMOUS_CODING | tTc/tCc                      | F81S    |
| RG74                  | AL123456_3 | 2984740 | A      | G             | Rv2668  | SNP   | NON_SYNONYMOUS_CODING | cAc/cCc                      | H3R     |
| RG74                  | AL123456_3 | 2991916 | A      | G             | Rv2675c | SNP   | SYNONYMOUS_CODING     | ccT/ccC                      | P7      |
| RG74                  | AL123456_3 | 2996026 | A      | C             | none    | SNP   | INTERGENIC            |                              |         |
| RG74                  | AL123456_3 | 3004091 | G      | A             | Rv2687c | SNP   | NON_SYNONYMOUS_CODING | Cgg/Tgg                      | R220W   |
| RG74                  | AL123456_3 | 3005185 | G      | T             | Rv2688c | SNP   | NON_SYNONYMOUS_CODING | Ccc/Acc                      | P156T   |
| RG74                  | AL123456_3 | 3009692 | A      | G             | Rv2691  | SNP   | NON_SYNONYMOUS_CODING | Acc/Gcc                      | T117A   |
| RG74                  | AL123456_3 | 3017465 | T      | C             | Rv2702  | SNP   | NON_SYNONYMOUS_CODING | aTa/aCa                      | I203T   |
| RG74                  | AL123456_3 | 3029610 | G      | A             | Rv2716  | SNP   | NON_SYNONYMOUS_CODING | GcG/cAc                      | A147T   |
| RG74                  | AL123456_3 | 3040838 | C      | T             | Rv2728c | SNP   | SYNONYMOUS_CODING     | ccG/cca                      | P208    |
| RG74                  | AL123456_3 | 3041871 | G      | T             | Rv2729c | SNP   | NON_SYNONYMOUS_CODING | gCg/gAg                      | A202E   |
| RG74                  | AL123456_3 | 3054081 | A      | G             | Rv2741  | SNP   | SYNONYMOUS_CODING     | ggA/ggG                      | G56     |
| RG74                  | AL123456_3 | 3054321 | A      | G             | Rv2741  | SNP   | SYNONYMOUS_CODING     | ggA/ggG                      | G136    |
| RG74                  | AL123456_3 | 3061615 | T      | C             | Rv2748c | SNP   | NON_SYNONYMOUS_CODING | Atg/Gtg                      | M298V   |
| RG74                  | AL123456_3 | 3068647 | C      | T             | Rv2756c | SNP   | SYNONYMOUS_CODING     | ttG/taA                      | L479    |
| RG74                  | AL123456_3 | 3073868 | T      | C             | Rv2764c | SNP   | NON_SYNONYMOUS_CODING | Acc/Gcc                      | T202A   |
| RG74                  | AL123456_3 | 3077039 | C      | A             | Rv2768c | SNP   | NON_SYNONYMOUS_CODING | gGc/gTc                      | G347V   |
| RG74                  | AL123456_3 | 3080795 | A      | G             | Rv2771c | SNP   | NON_SYNONYMOUS_CODING | cTc/cCc                      | L80P    |
| RG74                  | AL123456_3 | 3086788 | T      | C             | none    | SNP   | INTERGENIC            |                              |         |
| RG74                  | AL123456_3 | 3095331 | G      | A             | Rv2787  | SNP   | NON_SYNONYMOUS_CODING | cGc/cAc                      | R74H    |
| RG74                  | AL123456_3 | 3101119 | G      | T             | Rv2791c | SNP   | NON_SYNONYMOUS_CODING | CgC/AgC                      | R155S   |
| RG74                  | AL123456_3 | 3103682 | T      | C             | Rv2794c | SNP   | NON_SYNONYMOUS_CODING | Atg/Gtg                      | M87V    |
| RG74                  | AL123456_3 | 3106033 | C      | T             | Rv2797c | SNP   | SYNONYMOUS_CODING     | gtG/gtA                      | V425    |
| RG74                  | AL123456_3 | 3108055 | C      | T             | Rv2799  | SNP   | SYNONYMOUS_CODING     | gcC/gcT                      | A96     |
| RG74                  | AL123456_3 | 3108674 | A      | C             | Rv2800  | SNP   | SYNONYMOUS_CODING     | Agg/Cgg                      | R87     |
| RG74                  | AL123456_3 | 3113872 | A      | T             | Rv2807  | SNP   | NON_SYNONYMOUS_CODING | gAg/gTg                      | E72V    |
| TGCCGGGGTAGCTGATCGT   |            |         |        |               |         |       |                       |                              |         |
| GCGAATTCAGCCCATGCTC   |            |         |        |               |         |       |                       |                              |         |
| RG74                  | AL123456_3 | 3125425 | GC     | TGC           | Rv2818c | INDEL | FRAME_SHIFT           | -                            | -227    |
| RG74                  | AL123456_3 | 3131469 | TTGT   | TTGTCCGCGATGT | Rv2823c | INDEL | CODON_INSERTION       | -/ACATCGCCG                  | -101TSP |
| RG74                  | AL123456_3 | 3133536 | T      | C             | Rv2825c | SNP   | NON_SYNONYMOUS_CODING | Aaa/Gaa                      | K2E     |
| RG74                  | AL123456_3 | 3137058 | G      | A             | Rv2830c | SNP   | NON_SYNONYMOUS_CODING | gCg/gTg                      | A56V    |
| RG74                  | AL123456_3 | 3162805 | C      | G             | Rv2853  | SNP   | NON_SYNONYMOUS_CODING | Cgc/Ggc                      | R180G   |
| RG74                  | AL123456_3 | 3165074 | T      | C             | Rv2854  | SNP   | NON_SYNONYMOUS_CODING | tGt/gCg                      | V308A   |
| RG74                  | AL123456_3 | 3175702 | T      | C             | Rv2864c | SNP   | NON_SYNONYMOUS_CODING | Atc/Gtc                      | I522V   |
| RG74                  | AL123456_3 | 3177884 | C      | A             | Rv2866  | SNP   | SYNONYMOUS_CODING     | cgC/cgA                      | R21     |
| RG74                  | AL123456_3 | 3178445 | C      | G,A           | none    | SNP   | INTERGENIC            |                              |         |
| RG74                  | AL123456_3 | 3186860 | T      | G             | Rv2874  | SNP   | NON_SYNONYMOUS_CODING | Tat/Gat                      | Y672D   |







|      |            |         |      |      |         |       |                       |         |       |
|------|------------|---------|------|------|---------|-------|-----------------------|---------|-------|
| RG74 | AL123456_3 | 4109895 | G    | A    | Rv3668c | SNP   | NON_SYNONYMOUS_CODING | aCc/aTc | T196I |
| RG74 | AL123456_3 | 4111303 | G    | C    | Rv3669  | SNP   | SYNONYMOUS_CODING     | gtG/gtC | V159  |
| RG74 | AL123456_3 | 4131040 | C    | T    | Rv3689  | SNP   | SYNONYMOUS_CODING     | gcC/gcT | A228  |
| RG74 | AL123456_3 | 4135112 | G    | A    | Rv3693  | SNP   | NON_SYNONYMOUS_CODING | atG/ata | M129I |
| RG74 | AL123456_3 | 4156099 | C    | A    | Rv3711c | SNP   | NON_SYNONYMOUS_CODING | Gtg/Ttg | V211L |
| RG74 | AL123456_3 | 4161935 | G    | T    | Rv3718c | SNP   | SYNONYMOUS_CODING     | acC/aCa | T108  |
| RG74 | AL123456_3 | 4162339 | A    | G    | Rv3719  | SNP   | NON_SYNONYMOUS_CODING | Acg/Gcg | T12A  |
| RG74 | AL123456_3 | 4163944 | A    | G    | Rv3720  | SNP   | NON_SYNONYMOUS_CODING | cAt/cGt | H70R  |
| RG74 | AL123456_3 | 4167796 | G    | A    | Rv3722c | SNP   | SYNONYMOUS_CODING     | tcC/tcT | S111  |
| RG74 | AL123456_3 | 4171828 | G    | A    | Rv3726  | SNP   | SYNONYMOUS_CODING     | ccG/cCa | P136  |
| RG74 | AL123456_3 | 4174564 | T    | C    | Rv3727  | SNP   | NON_SYNONYMOUS_CODING | aTc/aCc | I537T |
| RG74 | AL123456_3 | 4182695 | G    | A    | Rv3731  | SNP   | NON_SYNONYMOUS_CODING | cGc/cAc | R313H |
| RG74 | AL123456_3 | 4187485 | T    | C    | Rv3736  | SNP   | SYNONYMOUS_CODING     | gcT/gcC | A284  |
| RG74 | AL123456_3 | 4187817 | A    | G    | Rv3737  | SNP   | NON_SYNONYMOUS_CODING | gAt/gGt | D40G  |
| RG74 | AL123456_3 | 4187873 | T    | C    | Rv3737  | SNP   | SYNONYMOUS_CODING     | Ttg/Ctg | L59   |
| RG74 | AL123456_3 | 4192124 | T    | C    | Rv3740c | SNP   | NON_SYNONYMOUS_CODING | cAt/cGt | H19R  |
| RG74 | AL123456_3 | 4197138 | CTT  | CTTT | none    | INDEL | INTERGENIC            |         |       |
| RG74 | AL123456_3 | 4204441 | A    | G    | Rv3759c | SNP   | SYNONYMOUS_CODING     | caT/caC | H311  |
| RG74 | AL123456_3 | 4204511 | A    | G    | Rv3759c | SNP   | NON_SYNONYMOUS_CODING | gTg/gCg | V288A |
| RG74 | AL123456_3 | 4210274 | A    | G    | Rv3764c | SNP   | NON_SYNONYMOUS_CODING | Tgt/Cgt | C246R |
| RG74 | AL123456_3 | 4216856 | A    | T    | none    | SNP   | INTERGENIC            |         |       |
| RG74 | AL123456_3 | 4220174 | G    | A    | Rv3775  | SNP   | NON_SYNONYMOUS_CODING | Gac/Aac | D164N |
| RG74 | AL123456_3 | 4221490 | C    | G    | Rv3776  | SNP   | SYNONYMOUS_CODING     | ctC/ctG | L134  |
| RG74 | AL123456_3 | 4222073 | A    | G    | Rv3776  | SNP   | NON_SYNONYMOUS_CODING | Atg/Gtg | M329V |
| RG74 | AL123456_3 | 4222882 | A    | G    | Rv3777  | SNP   | SYNONYMOUS_CODING     | ctA/ctG | L63   |
| RG74 | AL123456_3 | 4224784 | C    | T    | Rv3778c | SNP   | NON_SYNONYMOUS_CODING | Gtg/Atg | V38M  |
| RG74 | AL123456_3 | 4232399 | G    | A    | Rv3786c | SNP   | NON_SYNONYMOUS_CODING | aCc/aTc | T100I |
| RG74 | AL123456_3 | 4242643 | C    | T    | Rv3793  | SNP   | SYNONYMOUS_CODING     | cgC/cgT | R927  |
| RG74 | AL123456_3 | 4249447 | G    | A    | Rv3795  | SNP   | SYNONYMOUS_CODING     | gtG/gtA | V978  |
| RG74 | AL123456_3 | 4255922 | A    | G    | Rv3799c | SNP   | SYNONYMOUS_CODING     | caT/caC | H9    |
| RG74 | AL123456_3 | 4257220 | A    | G    | Rv3800c | SNP   | SYNONYMOUS_CODING     | cgT/cgC | R1309 |
| RG74 | AL123456_3 | 4264219 | T    | G    | Rv3802c | SNP   | SYNONYMOUS_CODING     | gA/gGc  | G49   |
| RG74 | AL123456_3 | 4264868 | A    | G    | Rv3803c | SNP   | NON_SYNONYMOUS_CODING | Tgg/Cgg | W199R |
| RG74 | AL123456_3 | 4281731 | A    | G    | Rv3817  | SNP   | NON_SYNONYMOUS_CODING | Aac/Gac | N29D  |
| RG74 | AL123456_3 | 4281849 | G    | C    | Rv3817  | SNP   | NON_SYNONYMOUS_CODING | tGg/tGg | W685  |
| RG74 | AL123456_3 | 4293072 | G    | A    | Rv3824c | SNP   | NON_SYNONYMOUS_CODING | Ctt/Ttt | L35F  |
| RG74 | AL123456_3 | 4294980 | G    | A    | Rv3825c | SNP   | SYNONYMOUS_CODING     | tcC/tcT | S42   |
| RG74 | AL123456_3 | 4302036 | T    | C    | Rv3827c | SNP   | NON_SYNONYMOUS_CODING | Acg/Gcg | T252A |
| RG74 | AL123456_3 | 4306155 | C    | T    | Rv3831  | SNP   | SYNONYMOUS_CODING     | agC/agT | S133  |
| RG74 | AL123456_3 | 4307179 | G    | A    | Rv3833  | SNP   | NON_SYNONYMOUS_CODING | Gtc/Atc | V105I |
| RG74 | AL123456_3 | 4315384 | T    | C    | Rv3842c | SNP   | NON_SYNONYMOUS_CODING | gAc/gGc | D60G  |
| RG74 | AL123456_3 | 4316046 | A    | G    | Rv3843c | SNP   | NON_SYNONYMOUS_CODING | gTc/gCc | V184A |
| RG74 | AL123456_3 | 4320050 | A    | G    | none    | SNP   | INTERGENIC            |         |       |
| RG74 | AL123456_3 | 4336090 | A    | AT   | none    | INDEL | INTERGENIC            |         |       |
| RG74 | AL123456_3 | 4338595 | GC   | G    | none    | INDEL | INTERGENIC            |         |       |
| RG74 | AL123456_3 | 4338732 | G    | A    | none    | SNP   | INTERGENIC            |         |       |
| RG74 | AL123456_3 | 4340330 | T    | G    | Rv3864  | SNP   | NON_SYNONYMOUS_CODING | Ttg/Gtg | L21V  |
| RG74 | AL123456_3 | 4351039 | G    | T    | Rv3872  | SNP   | STOP_GAINED           | Gaa/Taa | E99*  |
| RG74 | AL123456_3 | 4356110 | G    | C    | Rv3877  | SNP   | SYNONYMOUS_CODING     | ctG/ctC | L368  |
| RG74 | AL123456_3 | 4363069 | T    | C    | Rv3882c | SNP   | NON_SYNONYMOUS_CODING | Atc/Gtc | I118V |
| RG74 | AL123456_3 | 4366272 | G    | C    | Rv3884c | SNP   | SYNONYMOUS_CODING     | gcC/gcG | A189  |
| RG74 | AL123456_3 | 4368772 | A    | C    | Rv3886c | SNP   | NON_SYNONYMOUS_CODING | Tcg/Gcg | S467A |
| RG74 | AL123456_3 | 4373496 | C    | G    | Rv3889c | SNP   | SYNONYMOUS_CODING     | gtG/gtC | V45   |
| RG74 | AL123456_3 | 4375628 | G    | T    | Rv3892c | SNP   | NON_SYNONYMOUS_CODING | aCg/aAg | T19K  |
| RG74 | AL123456_3 | 4376098 | G    | A    | none    | SNP   | INTERGENIC            |         |       |
| RG74 | AL123456_3 | 4378181 | G    | C    | Rv3894c | SNP   | NON_SYNONYMOUS_CODING | Caa/Gaa | Q758E |
| RG74 | AL123456_3 | 4379680 | C    | G    | Rv3894c | SNP   | NON_SYNONYMOUS_CODING | cGc/cCc | R258P |
| RG74 | AL123456_3 | 4382054 | T    | C    | Rv3896c | SNP   | SYNONYMOUS_CODING     | gcA/gcG | A266  |
| RG74 | AL123456_3 | 4382275 | G    | T    | Rv3896c | SNP   | NON_SYNONYMOUS_CODING | Caa/Aaa | Q193K |
| RG74 | AL123456_3 | 4385530 | G    | C    | Rv3900c | SNP   | NON_SYNONYMOUS_CODING | cCa/cCa | P260R |
| RG74 | AL123456_3 | 4390753 | C    | G    | Rv3905c | SNP   | SYNONYMOUS_CODING     | tcG/tcC | S93   |
| RG74 | AL123456_3 | 4391553 | C    | T    | Rv3906c | SNP   | SYNONYMOUS_CODING     | ccG/ccA | P18   |
| RG74 | AL123456_3 | 4398952 | G    | A    | Rv3910  | SNP   | NON_SYNONYMOUS_CODING | Gtc/Atc | V786I |
| RG74 | AL123456_3 | 4400660 | ACCC | ACC  | Rv3911  | INDEL | FRAME_SHIFT           | -       | -160  |
| RG74 | AL123456_3 | 4401536 | G    | A    | Rv3912  | SNP   | NON_SYNONYMOUS_CODING | Gcg/Acg | A223T |
| RG74 | AL123456_3 | 4404109 | A    | G    | Rv3915  | SNP   | SYNONYMOUS_CODING     | caA/caG | Q306  |
| RG74 | AL123456_3 | 4406017 | G    | C    | Rv3917c | SNP   | NON_SYNONYMOUS_CODING | Cag/Gag | Q159E |
| RG74 | AL123456_3 | 4408156 | A    | C    | Rv3919c | SNP   | NON_SYNONYMOUS_CODING | ctT/cGt | L16R  |

Supplementary Table 2 - Variants found for RG112 clinical isolate.

| Strain | Chromosome | Position       | Reference allele   | Mutated allele   | Affected ORF | Type  | Impact                | Codon Change | Mutation |
|--------|------------|----------------|--------------------|------------------|--------------|-------|-----------------------|--------------|----------|
| RG112  | AL123456_3 | 1977 A         | G                  | G                | none         | SNP   | INTERGENIC            |              |          |
| RG112  | AL123456_3 | 4013 T         | C                  | C                | Rv0003       | SNP   | NON_SYNONYMOUS_CODING | aTc/aCc      | I245T    |
| RG112  | AL123456_3 | 7362 G         | C                  | C                | Rv0006       | SNP   | NON_SYNONYMOUS_CODING | Gag/Cag      | E21Q     |
| RG112  | AL123456_3 | 7585 G         | C                  | C                | Rv0006       | SNP   | NON_SYNONYMOUS_CODING | aGc/aCc      | S95T     |
| RG112  | AL123456_3 | 8040 G         | A                  | A                | Rv0006       | SNP   | NON_SYNONYMOUS_CODING | Ggc/Agc      | G247S    |
| RG112  | AL123456_3 | 9304 G         | A                  | A                | Rv0006       | SNP   | NON_SYNONYMOUS_CODING | gGc/gAc      | G668D    |
| RG112  | AL123456_3 | 11879 A        | G                  | G                | Rv0008c      | SNP   | NON_SYNONYMOUS_CODING | Tcc/Ccc      | S145P    |
| RG112  | AL123456_3 | 14251 G        | A                  | A                | Rv0012       | SNP   | NON_SYNONYMOUS_CODING | Gat/Aat      | D55N     |
| RG112  | AL123456_3 | 14785 T        | C                  | C                | Rv0012       | SNP   | NON_SYNONYMOUS_CODING | Tgc/Cgc      | C233R    |
| RG112  | AL123456_3 | 17608 G        | C                  | C                | Rv0015c      | SNP   | NON_SYNONYMOUS_CODING | agC/agG      | S385R    |
| RG112  | AL123456_3 | 21795 G        | A                  | A                | Rv0018c      | SNP   | NON_SYNONYMOUS_CODING | Ccg/Tcg      | P463S    |
| RG112  | AL123456_3 | 26959 C        | G                  | G                | none         | SNP   | INTERGENIC            |              |          |
| RG112  | AL123456_3 | 30754 A        | G                  | G                | Rv0026       | SNP   | NON_SYNONYMOUS_CODING | Aag/Gag      | K345E    |
| RG112  | AL123456_3 | 33457 C        | T                  | T                | Rv0030       | SNP   | SYNONYMOUS_CODING     | caC/caT      | H78      |
| RG112  | AL123456_3 | 33551 T        | G                  | G                | Rv0030       | SNP   | STOP_LOST             | Tga/Gga      | *110G    |
| RG112  | AL123456_3 | 34044 T        | C                  | C                | none         | SNP   | INTERGENIC            |              |          |
| RG112  | AL123456_3 | 36470 GCCCCCCC | G                  | G                | Rv0032       | INDEL | FRAME_SHIFT           | -/C          | -728?    |
| RG112  | AL123456_3 | 37031 C        | G                  | G                | Rv0034       | SNP   | SYNONYMOUS_CODING     | gCc/gcC      | A55      |
| RG112  | AL123456_3 | 37763 G        | C                  | C                | Rv0035       | SNP   | NON_SYNONYMOUS_CODING | Gac/Cac      | D169H    |
| RG112  | AL123456_3 | 42967 G        | C                  | C                | Rv0040c      | SNP   | SYNONYMOUS_CODING     | ccC/ccG      | P133     |
| RG112  | AL123456_3 | 55553 C        | T                  | T                | Rv0050       | SNP   | NON_SYNONYMOUS_CODING | Ccg/Tcg      | P631S    |
| RG112  | AL123456_3 | 62049 A        | G                  | G                | Rv0058       | SNP   | NON_SYNONYMOUS_CODING | Agg/Ggg      | R552G    |
| RG112  | AL123456_3 | 63771 C        | A                  | A                | Rv0059       | SNP   | NON_SYNONYMOUS_CODING | cCg/cTg      | P191L    |
| RG112  | AL123456_3 | 69989 G        | T                  | T                | Rv0064       | SNP   | NON_SYNONYMOUS_CODING | gGt/gAt      | G457D    |
| RG112  | AL123456_3 | 70816 A        | G                  | G                | Rv0064       | SNP   | NON_SYNONYMOUS_CODING | Aac/Gac      | N733D    |
| RG112  | AL123456_3 | 71336 G        | C                  | C                | Rv0064       | SNP   | NON_SYNONYMOUS_CODING | cGc/ccC      | R906P    |
| RG112  | AL123456_3 | 74059 C        | T                  | T                | Rv0066c      | SNP   | SYNONYMOUS_CODING     | aaG/aaA      | K151     |
| RG112  | AL123456_3 | 75940 G        | C                  | C                | Rv0068       | SNP   | NON_SYNONYMOUS_CODING | Gtg/Ctg      | V214L    |
|        |            |                | TCGGTGGACCCGGTGA   |                  |              |       |                       |              |          |
|        |            |                | CCCGGTGACCCGGTGG   | TCGGTGGACCCGGTGA |              |       |                       |              |          |
|        |            |                | ACCCGGTGGACCCGGTGG | CCCGGTGACCCGGTGG |              |       |                       |              |          |
| RG112  | AL123456_3 | 79504 GAC      | G                  | G                | Rv0071       | INDEL | CODON_DELETION        | ccggtggac/-  | PVD22-   |
| RG112  | AL123456_3 | 80616 C        | G                  | G                | none         | SNP   | INTERGENIC            |              |          |
| RG112  | AL123456_3 | 92199 T        | C                  | C                | Rv0083       | SNP   | SYNONYMOUS_CODING     | act/acG      | T600     |
| RG112  | AL123456_3 | 104941 T       | C                  | C                | Rv0095c      | SNP   | NON_SYNONYMOUS_CODING | cAg/cGg      | Q92R     |
| RG112  | AL123456_3 | 104942 G       | C                  | C                | Rv0095c      | SNP   | NON_SYNONYMOUS_CODING | Cag/Gag      | Q92E     |
| RG112  | AL123456_3 | 104944 G       | A                  | A                | Rv0095c      | SNP   | NON_SYNONYMOUS_CODING | gCc/gTc      | A91V     |
| RG112  | AL123456_3 | 104962 G       | A                  | A                | Rv0095c      | SNP   | NON_SYNONYMOUS_CODING | gCc/gTg      | A85V     |
| RG112  | AL123456_3 | 105045 G       | C                  | C                | Rv0095c      | SNP   | NON_SYNONYMOUS_CODING | gaC/gaG      | D57E     |
| RG112  | AL123456_3 | 116000 T       | G                  | G                | Rv0101       | SNP   | SYNONYMOUS_CODING     | gtT/gtG      | V2000    |
| RG112  | AL123456_3 | 117352 C       | T                  | T                | Rv0101       | SNP   | NON_SYNONYMOUS_CODING | gCg/gTg      | A2451V   |
| RG112  | AL123456_3 | 122109 A       | G                  | G                | Rv0103c      | SNP   | NON_SYNONYMOUS_CODING | tTg/tcG      | L22S     |
| RG112  | AL123456_3 | 125830 GAAAA   | G                  | G                | Rv0107c      | INDEL | FRAME_SHIFT           | -/T          | -1569?   |
| RG112  | AL123456_3 | 132417 C       | G                  | G                | Rv0109       | SNP   | NON_SYNONYMOUS_CODING | Cgc/Ggc      | R346G    |
| RG112  | AL123456_3 | 133839 C       | T                  | T                | none         | SNP   | INTERGENIC            |              |          |
| RG112  | AL123456_3 | 133862 G       | A                  | A                | none         | SNP   | INTERGENIC            |              |          |
| RG112  | AL123456_3 | 146087 T       | C                  | C                | Rv0120c      | SNP   | NON_SYNONYMOUS_CODING | aAt/aGt      | N562S    |
| RG112  | AL123456_3 | 149323 C       | T                  | T                | none         | SNP   | INTERGENIC            |              |          |
| RG112  | AL123456_3 | 154283 T       | C                  | C                | Rv0127       | SNP   | NON_SYNONYMOUS_CODING | Tcg/Ccg      | S18P     |
| RG112  | AL123456_3 | 157292 C       | T                  | T                | Rv0129c      | SNP   | SYNONYMOUS_CODING     | gaG/gaA      | E103     |
| RG112  | AL123456_3 | 160214 T       | C                  | C                | Rv0132c      | SNP   | NON_SYNONYMOUS_CODING | tAt/tgT      | Y190C    |
| RG112  | AL123456_3 | 162581 G       | A                  | A                | Rv0134       | SNP   | NON_SYNONYMOUS_CODING | Ggc/Agc      | G271S    |
| RG112  | AL123456_3 | 177857 G       | A                  | A                | Rv0151c      | SNP   | SYNONYMOUS_CODING     | Ctg/Ttg      | L48S     |
| RG112  | AL123456_3 | 178941 G       | T                  | T                | Rv0151c      | SNP   | NON_SYNONYMOUS_CODING | aaC/aaA      | N123K    |
| RG112  | AL123456_3 | 180025 C       | T                  | T                | Rv0152c      | SNP   | NON_SYNONYMOUS_CODING | gGg/gaG      | G291E    |
| RG112  | AL123456_3 | 188800 T       | C                  | C                | Rv0159c      | SNP   | NON_SYNONYMOUS_CODING | Acg/Gcg      | T14A     |
| RG112  | AL123456_3 | 194681 G       | C                  | C                | Rv0165c      | SNP   | SYNONYMOUS_CODING     | ctC/ctG      | L4S      |
|        |            |                | ATTGCCGGGGACTTGCCG |                  |              |       |                       |              |          |
| RG112  | AL123456_3 | 194849 GGG     | G                  | G                | ATTGCCGGGG   | INDEL | INTERGENIC            |              |          |
| RG112  | AL123456_3 | 196517 G       | T                  | T                | Rv0166       | SNP   | NON_SYNONYMOUS_CODING | Gtg/Ttg      | V509L    |
| RG112  | AL123456_3 | 196642 C       | T                  | T                | Rv0166       | SNP   | SYNONYMOUS_CODING     | aaC/aaT      | N550     |
| RG112  | AL123456_3 | 199390 C       | G                  | G                | Rv0169       | SNP   | NON_SYNONYMOUS_CODING | aCc/aGc      | T286S    |
| RG112  | AL123456_3 | 202774 A       | C                  | C                | Rv0172       | SNP   | NON_SYNONYMOUS_CODING | aAt/aGt      | N100S    |
| RG112  | AL123456_3 | 203269 C       | T                  | T                | Rv0172       | SNP   | NON_SYNONYMOUS_CODING | gCg/gGg      | A265V    |
| RG112  | AL123456_3 | 206339 T       | C                  | C                | Rv0174       | SNP   | NON_SYNONYMOUS_CODING | ctG/cGc      | L370P    |
| RG112  | AL123456_3 | 207226 T       | C                  | C                | Rv0175       | SNP   | NON_SYNONYMOUS_CODING | aTg/aCg      | M138T    |
| RG112  | AL123456_3 | 209462 C       | T                  | T                | Rv0178       | SNP   | SYNONYMOUS_CODING     | acc/acT      | T17S     |
| RG112  | AL123456_3 | 211192 T       | C                  | C                | Rv0180c      | SNP   | SYNONYMOUS_CODING     | gaA/gaG      | E353     |
| RG112  | AL123456_3 | 211800 C       | T                  | T                | Rv0180c      | SNP   | NON_SYNONYMOUS_CODING | Gct/Act      | A151T    |
| RG112  | AL123456_3 | 212353 C       | T                  | T                | Rv0181c      | SNP   | NON_SYNONYMOUS_CODING | cGc/cAc      | R220H    |
| RG112  | AL123456_3 | 216982 C       | T                  | T                | Rv0186       | SNP   | SYNONYMOUS_CODING     | ccC/ccT      | P238     |
| RG112  | AL123456_3 | 223942 T       | C                  | C                | Rv0192       | SNP   | NON_SYNONYMOUS_CODING | Tcg/Ccg      | S127P    |
| RG112  | AL123456_3 | 225323 T       | C                  | C                | Rv0193c      | SNP   | NON_SYNONYMOUS_CODING | Aag/Gag      | K417E    |
| RG112  | AL123456_3 | 227098 T       | C                  | C                | Rv0194       | SNP   | NON_SYNONYMOUS_CODING | aTg/aCg      | M74T     |
| RG112  | AL123456_3 | 231114 C       | G                  | G                | Rv0195       | SNP   | SYNONYMOUS_CODING     | gCg/gcG      | A72      |
| RG112  | AL123456_3 | 234477 T       | G                  | G                | Rv0197       | SNP   | STOP_GAINED           | taT/taG      | Y749*    |
| RG112  | AL123456_3 | 234496 C       | CGT                | CGT              | Rv0197       | INDEL | FRAME_SHIFT           | -/GT         | -756?    |
| RG112  | AL123456_3 | 247749 A       | G                  | G                | Rv0207c      | SNP   | NON_SYNONYMOUS_CODING | Ttc/Ctc      | F122L    |
| RG112  | AL123456_3 | 248539 A       | G                  | G                | Rv0208c      | SNP   | NON_SYNONYMOUS_CODING | gTg/gGg      | V123A    |
| RG112  | AL123456_3 | 255323 G       | A                  | A                | Rv0213c      | SNP   | SYNONYMOUS_CODING     | Ctg/Ttg      | L210     |
| RG112  | AL123456_3 | 261869 T       | C                  | C                | Rv0218       | SNP   | NON_SYNONYMOUS_CODING | Tgt/Cgt      | C316R    |
| RG112  | AL123456_3 | 265554 A       | C                  | C                | Rv0222       | SNP   | SYNONYMOUS_CODING     | gtA/gtC      | V16      |
| RG112  | AL123456_3 | 274683 T       | G                  | G                | Rv0229c      | SNP   | NON_SYNONYMOUS_CODING | Aaa/Caa      | K102Q    |
| RG112  | AL123456_3 | 278681 C       | G                  | G                | Rv0233       | SNP   | NON_SYNONYMOUS_CODING | Cat/Gat      | H33D     |
| RG112  | AL123456_3 | 283614 T       | C                  | C                | Rv0236c      | SNP   | NON_SYNONYMOUS_CODING | Agc/Ggc      | S1080G   |
| RG112  | AL123456_3 | 285772 A       | C                  | C                | Rv0236c      | SNP   | SYNONYMOUS_CODING     | ccT/ccG      | P360     |
| RG112  | AL123456_3 | 285871 A       | G                  | G                | Rv0236c      | SNP   | SYNONYMOUS_CODING     | gtT/gtC      | V327     |
| RG112  | AL123456_3 | 290055 C       | G                  | G                | Rv0241c      | SNP   | SYNONYMOUS_CODING     | gCg/gcC      | A200     |
| RG112  | AL123456_3 | 292261 G       | A                  | A                | Rv0243       | SNP   | NON_SYNONYMOUS_CODING | Gcc/Acc      | A31T     |
| RG112  | AL123456_3 | 293704 CTTTTT  | C                  | C                | TTTT         | INDEL | INTERGENIC            |              |          |
| RG112  | AL123456_3 | 310973 G       | A                  | A                | Rv0259c      | SNP   | NON_SYNONYMOUS_CODING | gCg/gTg      | A182V    |
| RG112  | AL123456_3 | 311613 G       | T                  | T                | Rv0260c      | SNP   | SYNONYMOUS_CODING     | gtC/gtA      | V349     |
| RG112  | AL123456_3 | 315755 C       | G                  | G                | Rv0263c      | SNP   | SYNONYMOUS_CODING     | ctC/ctG      | L4       |
| RG112  | AL123456_3 | 316129 C       | G                  | G                | Rv0264c      | SNP   | NON_SYNONYMOUS_CODING | gCc/gCc      | G96A     |
| RG112  | AL123456_3 | 328219 G       | A                  | A                | Rv0271c      | SNP   | SYNONYMOUS_CODING     | ggC/ggT      | G81      |
| RG112  | AL123456_3 | 331759 G       | T                  | T                | Rv0276       | SNP   | SYNONYMOUS_CODING     | tcG/tcT      | S4       |
| RG112  | AL123456_3 | 335956 C       | T                  | T                | Rv0278c      | SNP   | NON_SYNONYMOUS_CODING | Gcc/Acc      | A119T    |
| RG112  | AL123456_3 | 336698 C       | G                  | G                | Rv0279c      | SNP   | SYNONYMOUS_CODING     | ggG/ggC      | G792     |
| RG112  | AL123456_3 | 336701 A       | G                  | G                | Rv0279c      | SNP   | SYNONYMOUS_CODING     | ggT/ggC      | G791     |

|       |            |        |               |                    |         |       |                       |                      |           |
|-------|------------|--------|---------------|--------------------|---------|-------|-----------------------|----------------------|-----------|
| RG112 | AL123456_3 | 337820 | G             | A                  | Rv0279c | SNP   | SYNONYMOUS_CODING     | ggC/ggT              | G418      |
| RG112 | AL123456_3 | 338100 | T             | C                  | Rv0279c | SNP   | NON_SYNONYMOUS_CODING | aAc/aGc              | N3255     |
| RG112 | AL123456_3 | 338876 | G             | A                  | Rv0279c | SNP   | SYNONYMOUS_CODING     | agC/agT              | S66       |
| RG112 | AL123456_3 | 338960 | T             | C                  | Rv0279c | SNP   | SYNONYMOUS_CODING     | gCa/gGc              | A38       |
| RG112 | AL123456_3 | 338963 | T             | C                  | Rv0279c | SNP   | SYNONYMOUS_CODING     | acA/acG              | T37       |
| RG112 | AL123456_3 | 338984 | C             | T                  | Rv0279c | SNP   | SYNONYMOUS_CODING     | gcG/gcA              | A30       |
| RG112 | AL123456_3 | 340372 | T             | C                  | Rv0280  | SNP   | NON_SYNONYMOUS_CODING | TcG/CgG              | S337P     |
| RG112 | AL123456_3 | 346275 | C             | G                  | Rv0284  | SNP   | NON_SYNONYMOUS_CODING | cCg/cGg              | P214R     |
| RG112 | AL123456_3 | 356528 | A             | G                  | Rv0292  | SNP   | NON_SYNONYMOUS_CODING | AaT/Gat              | N217D     |
| RG112 | AL123456_3 | 366088 | A             | G                  | Rv0303  | SNP   | SYNONYMOUS_CODING     | gcA/gcG              | A285      |
| RG112 | AL123456_3 | 373282 | TAA           | TA                 | Rv0305c | INDEL | FRAME_SHIFT           | -                    | -810      |
| RG112 | AL123456_3 | 376774 | T             | C                  | Rv0307c | SNP   | SYNONYMOUS_CODING     | gcA/gcG              | A94       |
| RG112 | AL123456_3 | 384380 | A             | C                  | Rv0315  | SNP   | NON_SYNONYMOUS_CODING | aAg/aCg              | K260T     |
| RG112 | AL123456_3 | 386432 | C             | G                  | Rv0318c | SNP   | NON_SYNONYMOUS_CODING | gGg/gCg              | G223A     |
| RG112 | AL123456_3 | 387353 | G             | A                  | Rv0319  | SNP   | NON_SYNONYMOUS_CODING | gGc/gAc              | G69D      |
| RG112 | AL123456_3 | 390828 | T             | C                  | Rv0323c | SNP   | NON_SYNONYMOUS_CODING | Agt/Ggt              | S142G     |
| RG112 | AL123456_3 | 401678 | C             | A                  | Rv0336  | SNP   | NON_SYNONYMOUS_CODING | cCc/cAc              | P496H     |
| RG112 | AL123456_3 | 403364 | G             | A                  | Rv0338c | SNP   | SYNONYMOUS_CODING     | ccC/ccT              | P826      |
| RG112 | AL123456_3 | 403920 | C             | T                  | Rv0338c | SNP   | NON_SYNONYMOUS_CODING | cCc/cAc              | R641H     |
| RG112 | AL123456_3 | 403980 | G             | A                  | Rv0338c | SNP   | NON_SYNONYMOUS_CODING | gCc/gTc              | A621V     |
| RG112 | AL123456_3 | 404326 | T             | C                  | Rv0338c | SNP   | NON_SYNONYMOUS_CODING | Agg/Ggg              | R506G     |
| RG112 | AL123456_3 | 408723 | C             | T                  | Rv0340  | SNP   | SYNONYMOUS_CODING     | atC/atT              | I30       |
| RG112 | AL123456_3 | 414486 | C             | T                  | Rv0344c | SNP   | SYNONYMOUS_CODING     | gaG/gaA              | E152      |
| RG112 | AL123456_3 | 420008 | A             | G                  | Rv0350  | SNP   | SYNONYMOUS_CODING     | gcA/gcG              | A58       |
| RG112 | AL123456_3 | 424320 | TCC           | TCCC               | Rv0354c | INDEL | FRAME_SHIFT           | -/G                  | -124?     |
| RG112 | AL123456_3 | 425353 | GCC           | GCCC               | Rv0355c | INDEL | FRAME_SHIFT           | -/G                  | -3108?    |
|       |            |        |               |                    |         |       |                       |                      |           |
|       |            |        |               |                    |         |       |                       |                      |           |
|       |            |        |               |                    |         |       |                       |                      |           |
| RG112 | AL123456_3 | 427310 | GTTTGCACCTGCC | CGTAGGTTTGCACCTGCC | Rv0355c | INDEL | CODON_DELETION        | ggcagtgcaaacctc/-    | GSANL243I |
|       |            |        |               |                    |         |       |                       |                      |           |
|       |            |        |               |                    |         |       |                       |                      |           |
| RG112 | AL123456_3 | 428109 | GT            | AGCCGGT            | Rv0355c | INDEL | CODON_DELETION        | accggctctcaaacaccggc | TGFYNTGD  |
| RG112 | AL123456_3 | 435553 | C             | T                  | Rv0357c | SNP   | NON_SYNONYMOUS_CODING | gGa/gAa              | G406E     |
| RG112 | AL123456_3 | 444351 | G             | T                  | Rv0366c | SNP   | NON_SYNONYMOUS_CODING | aaC/aaA              | N155K     |
| RG112 | AL123456_3 | 446786 | G             | A                  | Rv0369c | SNP   | SYNONYMOUS_CODING     | gcC/ggT              | G87       |
| RG112 | AL123456_3 | 454295 | T             | C                  | Rv0376c | SNP   | SYNONYMOUS_CODING     | ccA/ccG              | P26       |
| RG112 | AL123456_3 | 457452 | T             | G                  | Rv0381c | SNP   | SYNONYMOUS_CODING     | acA/acC              | T124      |
| RG112 | AL123456_3 | 459399 | A             | C                  | none    | SNP   | INTERGENIC            |                      |           |
| RG112 | AL123456_3 | 460423 | A             | G                  | Rv0384c | SNP   | NON_SYNONYMOUS_CODING | gTg/gCg              | V527A     |
| RG112 | AL123456_3 | 467497 | CGGG          | CGGGG              | Rv0388c | INDEL | FRAME_SHIFT           | -/C                  | -167?     |
| RG112 | AL123456_3 | 467516 | G             | C                  | Rv0388c | SNP   | SYNONYMOUS_CODING     | tcC/tcG              | S162      |
| RG112 | AL123456_3 | 467526 | C             | G                  | Rv0388c | SNP   | NON_SYNONYMOUS_CODING | gGg/gCg              | G159A     |
| RG112 | AL123456_3 | 467546 | G             | C                  | Rv0388c | SNP   | NON_SYNONYMOUS_CODING | gaC/gaG              | D152E     |
| RG112 | AL123456_3 | 467557 | A             | C                  | Rv0388c | SNP   | NON_SYNONYMOUS_CODING | Ttg/Ttg              | L149V     |
| RG112 | AL123456_3 | 467564 | A             | C                  | Rv0388c | SNP   | NON_SYNONYMOUS_CODING | caT/caG              | H146Q     |
| RG112 | AL123456_3 | 467585 | G             | C                  | Rv0388c | SNP   | NON_SYNONYMOUS_CODING | caC/caG              | H139Q     |
| RG112 | AL123456_3 | 467590 | T             | C                  | Rv0388c | SNP   | NON_SYNONYMOUS_CODING | Acg/Gcg              | T138A     |
| RG112 | AL123456_3 | 467621 | T             | G                  | Rv0388c | SNP   | SYNONYMOUS_CODING     | ggA/ggC              | G127      |
| RG112 | AL123456_3 | 467638 | G             | T                  | Rv0388c | SNP   | NON_SYNONYMOUS_CODING | CaG/AaG              | Q122K     |
| RG112 | AL123456_3 | 471621 | C             | T                  | Rv0392c | SNP   | NON_SYNONYMOUS_CODING | gGg/gAg              | G340E     |
| RG112 | AL123456_3 | 472705 | T             | C                  | none    | SNP   | INTERGENIC            |                      |           |
| RG112 | AL123456_3 | 475178 | T             | C                  | Rv0395  | SNP   | NON_SYNONYMOUS_CODING | gTc/gCc              | V80A      |
| RG112 | AL123456_3 | 479632 | G             | T                  | Rv0400c | SNP   | NON_SYNONYMOUS_CODING | aCc/aAc              | T41N      |
| RG112 | AL123456_3 | 489416 | G             | C                  | Rv0405  | SNP   | NON_SYNONYMOUS_CODING | gGc/gCc              | G1229A    |
| RG112 | AL123456_3 | 489935 | G             | C                  | Rv0406c | SNP   | NON_SYNONYMOUS_CODING | cGg/cCg              | R1402P    |
| RG112 | AL123456_3 | 497129 | G             | T                  | Rv0410c | SNP   | SYNONYMOUS_CODING     | gcC/gcA              | A62       |
| RG112 | AL123456_3 | 498557 | C             | A                  | Rv0412c | SNP   | NON_SYNONYMOUS_CODING | Gac/Tac              | D355Y     |
| RG112 | AL123456_3 | 499798 | G             | A                  | Rv0413  | SNP   | STOP_GAINED           | tGg/tAg              | W29*      |
| RG112 | AL123456_3 | 502589 | C             | G                  | Rv0417  | SNP   | NON_SYNONYMOUS_CODING | tCc/tcC              | S75C      |
| RG112 | AL123456_3 | 503354 | G             | C                  | none    | SNP   | INTERGENIC            |                      |           |
| RG112 | AL123456_3 | 513257 | T             | C                  | Rv0425c | SNP   | NON_SYNONYMOUS_CODING | Atg/Gtg              | M689V     |
| RG112 | AL123456_3 | 534691 | C             | T                  | Rv0446c | SNP   | STOP_GAINED           | tgG/tgA              | W175*     |
| RG112 | AL123456_3 | 535695 | C             | T                  | Rv0447c | SNP   | SYNONYMOUS_CODING     | ggG/ggA              | G271      |
| RG112 | AL123456_3 | 541201 | A             | G                  | Rv0450c | SNP   | SYNONYMOUS_CODING     | ctT/ctC              | L97       |
| RG112 | AL123456_3 | 546827 | C             | T                  | none    | SNP   | INTERGENIC            |                      |           |
| RG112 | AL123456_3 | 551525 | A             | C                  | Rv0459  | SNP   | SYNONYMOUS_CODING     | Aga/Cga              | R110      |
| RG112 | AL123456_3 | 558501 | C             | T                  | Rv0467  | SNP   | SYNONYMOUS_CODING     | gaC/gaT              | D325      |
| RG112 | AL123456_3 | 563420 | T             | G                  | Rv0472c | SNP   | NON_SYNONYMOUS_CODING | gAg/gGg              | E3G       |
| RG112 | AL123456_3 | 573262 | A             | C                  | Rv0484c | SNP   | SYNONYMOUS_CODING     | ggT/ggC              | G180      |
|       |            |        |               |                    |         |       |                       |                      |           |
|       |            |        |               |                    |         |       |                       |                      |           |
|       |            |        |               |                    |         |       |                       |                      |           |
| RG112 | AL123456_3 | 580773 | GCGGGGAG      | GG                 | none    | INDEL | INTERGENIC            |                      |           |
| RG112 | AL123456_3 | 584438 | G             | A                  | Rv0493c | SNP   | NON_SYNONYMOUS_CODING | Ccc/Tcc              | P855      |
| RG112 | AL123456_3 | 589536 | G             | A                  | Rv0499  | SNP   | SYNONYMOUS_CODING     | ctG/cta              | L118      |
| RG112 | AL123456_3 | 590436 | T             | C                  | Rv0500  | SNP   | SYNONYMOUS_CODING     | gcT/gcC              | A118      |
| RG112 | AL123456_3 | 595192 | G             | A                  | Rv0504c | SNP   | SYNONYMOUS_CODING     | gaC/gaT              | D37       |
| RG112 | AL123456_3 | 597816 | A             | G                  | Rv0507  | SNP   | SYNONYMOUS_CODING     | gcA/gcG              | A206      |
| RG112 | AL123456_3 | 598475 | G             | A                  | Rv0507  | SNP   | NON_SYNONYMOUS_CODING | cGc/cAc              | R426H     |
| RG112 | AL123456_3 | 603122 | C             | T                  | Rv0511  | SNP   | SYNONYMOUS_CODING     | Ctg/Ttg              | L102      |
| RG112 | AL123456_3 | 610120 | T             | G                  | none    | SNP   | INTERGENIC            |                      |           |
| RG112 | AL123456_3 | 623472 | A             | G                  | Rv0532  | SNP   | NON_SYNONYMOUS_CODING | gAc/gGc              | D227G     |
| RG112 | AL123456_3 | 623508 | C             | G                  | Rv0532  | SNP   | NON_SYNONYMOUS_CODING | gCc/gCc              | A239G     |
| RG112 | AL123456_3 | 637319 | G             | A                  | Rv0545c | SNP   | NON_SYNONYMOUS_CODING | Cct/Tct              | P495      |
| RG112 | AL123456_3 | 637922 | C             | T                  | Rv0546c | SNP   | SYNONYMOUS_CODING     | caG/caA              | Q16       |
| RG112 | AL123456_3 | 648002 | T             | G                  | Rv0556  | SNP   | NON_SYNONYMOUS_CODING | cTc/cGc              | L15R      |
| RG112 | AL123456_3 | 664249 | C             | T                  | Rv0571c | SNP   | SYNONYMOUS_CODING     | caG/caA              | Q190      |
| RG112 | AL123456_3 | 665293 | A             | G                  | Rv0572c | SNP   | NON_SYNONYMOUS_CODING | Ttc/Ctc              | F31L      |
| RG112 | AL123456_3 | 669398 | T             | C                  | Rv0575c | SNP   | SYNONYMOUS_CODING     | caA/caG              | Q116      |
| RG112 | AL123456_3 | 671876 | G             | A                  | Rv0577  | SNP   | SYNONYMOUS_CODING     | tcG/tcA              | S237      |
| RG112 | AL123456_3 | 672491 | C             | G                  | Rv0578c | SNP   | SYNONYMOUS_CODING     | ggG/ggC              | G1142     |
| RG112 | AL123456_3 | 673238 | A             | T                  | Rv0578c | SNP   | SYNONYMOUS_CODING     | caT/caC              | H893      |
| RG112 | AL123456_3 | 675673 | C             | G                  | Rv0578c | SNP   | NON_SYNONYMOUS_CODING | Gcc/Acc              | A82T      |
| RG112 | AL123456_3 | 682203 | A             | G                  | Rv0585c | SNP   | NON_SYNONYMOUS_CODING | aTa/aCa              | I457T     |
| RG112 | AL123456_3 | 685461 | C             | G                  | Rv0587  | SNP   | SYNONYMOUS_CODING     | gcc/gcG              | A111      |
| RG112 | AL123456_3 | 685608 | T             | C                  | Rv0587  | SNP   | SYNONYMOUS_CODING     | ctT/ctC              | L160      |
| RG112 | AL123456_3 | 686972 | T             | C                  | Rv0589  | SNP   | NON_SYNONYMOUS_CODING | tTc/tcG              | F51S      |
| RG112 | AL123456_3 | 690465 | T             | G                  | Rv0591  | SNP   | SYNONYMOUS_CODING     | ctT/ctC              | L469      |
| RG112 | AL123456_3 | 698968 | G             | A                  | Rv0601c | SNP   | SYNONYMOUS_CODING     | ggC/ggT              | G9        |
| RG112 | AL123456_3 | 709226 | G             | A                  | Rv0613c | SNP   | NON_SYNONYMOUS_CODING | aCc/atC              | T97I      |
| RG112 | AL123456_3 | 726703 | C             | A                  | Rv0631c | SNP   | NON_SYNONYMOUS_CODING | aGg/aTg              | R535M     |

|       |            |                      |                  |                   |       |                            |                  |          |
|-------|------------|----------------------|------------------|-------------------|-------|----------------------------|------------------|----------|
| RG112 | AL123456_3 | 731027 T             | C                | Rv0634c           | SNP   | NON_SYNONYMOUS_CODING      | Aag/Gag          | K3E      |
| RG112 | AL123456_3 | 736710 T             | C                | Rv0642c           | SNP   | NON_SYNONYMOUS_CODING      | aAc/aGc          | N165S    |
| RG112 | AL123456_3 | 750829 G             | A                | Rv0654            | SNP   | NON_SYNONYMOUS_CODING      | cGc/cAc          | R277H    |
| RG112 | AL123456_3 | 752343 A             | G                | Rv0655            | SNP   | NON_SYNONYMOUS_CODING      | gAg/gGg          | E276G    |
| RG112 | AL123456_3 | 752802 A             | C                | none              | SNP   | INTERGENIC                 |                  |          |
| RG112 | AL123456_3 | 754186 A             | G                | Rv0658c           | SNP   | NON_SYNONYMOUS_CODING      | cTc/cCc          | L75P     |
| RG112 | AL123456_3 | 761119 ACCC          | ACCCCGAGAACATCCC | Rv0667            | INDEL | CODON_CHANGE_PLUS_CODON_IN | ccg/ccCGAACATCCC | P439PQNF |
| RG112 | AL123456_3 | 764995 C             | G                | Rv0668            | SNP   | SYNONYMOUS_CODING          | gcC/gcG          | A542     |
| RG112 | AL123456_3 | 769358 CAAA          | CAAAAA           | Rv0669c           | INDEL | FRAME_SHIFT                | -/TT             | -79?     |
| RG112 | AL123456_3 | 769663 T             | G                | none              | SNP   | INTERGENIC                 |                  |          |
| RG112 | AL123456_3 | 773809 G             | A                | Rv0673            | SNP   | SYNONYMOUS_CODING          | gaG/gaA          | E229     |
| RG112 | AL123456_3 | 775639 T             | C                | Rv0676c           | SNP   | NON_SYNONYMOUS_CODING      | Att/Git          | I948V    |
| RG112 | AL123456_3 | 781395 T             | C                | none              | SNP   | INTERGENIC                 |                  |          |
| RG112 | AL123456_3 | 796509 G             | T                | Rv0696            | SNP   | NON_SYNONYMOUS_CODING      | Ggc/Tgc          | G331C    |
| RG112 | AL123456_3 | 812808 G             | A                | Rv0717            | SNP   | STOP_GAINED                | tGg/tAg          | W61*     |
| RG112 | AL123456_3 | 820483 G             | T                | Rv0727c           | SNP   | NON_SYNONYMOUS_CODING      | gCc/gAc          | A6D      |
| RG112 | AL123456_3 | 836291 A             | G                | Rv0746            | SNP   | SYNONYMOUS_CODING          | ggA/ggG          | G197     |
| RG112 | AL123456_3 | 836426 A             | C                | Rv0746            | SNP   | SYNONYMOUS_CODING          | ctA/ctC          | L242     |
| RG112 | AL123456_3 | 836454 A             | G                | Rv0746            | SNP   | NON_SYNONYMOUS_CODING      | Act/Gct          | T252A    |
| RG112 | AL123456_3 | 836538 A             | G                | Rv0746            | SNP   | NON_SYNONYMOUS_CODING      | Aac/Gac          | N280D    |
| RG112 | AL123456_3 | 836658 A             | G                | Rv0746            | SNP   | NON_SYNONYMOUS_CODING      | Acc/Gcc          | T320A    |
| RG112 | AL123456_3 | 837033 A             | G                | Rv0746            | SNP   | NON_SYNONYMOUS_CODING      | Acc/Gcc          | T445A    |
| RG112 | AL123456_3 | 841764 G             | C                | Rv0749A           | SNP   | SYNONYMOUS_CODING          | acC/acG          | T37      |
| RG112 | AL123456_3 | 852910 C             | T                | Rv0758            | SNP   | NON_SYNONYMOUS_CODING      | cCc/cTc          | P172L    |
| RG112 | AL123456_3 | 854252 G             | G                | none              | INDEL | INTERGENIC                 |                  |          |
| RG112 | AL123456_3 | 854252 G             | GC               | GC                |       |                            |                  |          |
| RG112 | AL123456_3 | 857696 A             | G                | Rv0764c           | SNP   | SYNONYMOUS_CODING          | gct/gcC          | A114     |
| RG112 | AL123456_3 | 880562 G             | T                | Rv0785            | SNP   | NON_SYNONYMOUS_CODING      | tGc/tTc          | C408F    |
| RG112 | AL123456_3 | 882257 T             | C                | Rv0787            | SNP   | NON_SYNONYMOUS_CODING      | Tac/Cac          | Y267H    |
| RG112 | AL123456_3 | 885542 G             | C                | Rv0791c           | SNP   | NON_SYNONYMOUS_CODING      | TcC/tGc          | S100C    |
| RG112 | AL123456_3 | 889020 GT            | G                | none              | INDEL | INTERGENIC                 |                  |          |
| RG112 | AL123456_3 | 893733 T             | C                | Rv0800            | SNP   | NON_SYNONYMOUS_CODING      | cTg/cGg          | L139R    |
| RG112 | AL123456_3 | 895260 G             | C                | Rv0802c           | SNP   | SYNONYMOUS_CODING          | ggC/ggG          | G123     |
| RG112 | AL123456_3 | 900221 T             | C                | Rv0806c           | SNP   | SYNONYMOUS_CODING          | gtA/gtG          | V370     |
| RG112 | AL123456_3 | 901097 A             | G                | Rv0806c           | SNP   | SYNONYMOUS_CODING          | cgT/cgC          | R78      |
| RG112 | AL123456_3 | 903550 T             | C                | Rv0808            | SNP   | SYNONYMOUS_CODING          | gct/gcC          | A480     |
| RG112 | AL123456_3 | 903913 T             | C                | Rv0809            | SNP   | SYNONYMOUS_CODING          | ggT/ggC          | G63      |
| RG112 | AL123456_3 | 906857 A             | G                | Rv0812            | SNP   | NON_SYNONYMOUS_CODING      | atA/atG          | I145M    |
| RG112 | AL123456_3 | 911946 C             | T                | Rv0819            | SNP   | NON_SYNONYMOUS_CODING      | Cgg/Tgg          | R71W     |
| RG112 | AL123456_3 | 917366 T             | C                | Rv0823c           | SNP   | NON_SYNONYMOUS_CODING      | gAt/gtG          | D94G     |
| RG112 | AL123456_3 | 919393 G             | C                | Rv0825c           | SNP   | NON_SYNONYMOUS_CODING      | aCa/aGa          | T54R     |
| RG112 | AL123456_3 | 921813 C             | G                | Rv0829            | SNP   | NON_SYNONYMOUS_CODING      | gCa/gaA          | A80G     |
| RG112 | AL123456_3 | 925274 C             | G                | Rv0832            | SNP   | SYNONYMOUS_CODING          | ccC/ccG          | P108     |
| RG112 | AL123456_3 | 928691 C             | T                | Rv0834c           | SNP   | NON_SYNONYMOUS_CODING      | Gcc/Acc          | A599T    |
| RG112 | AL123456_3 | 934120 G             | A                | none              | SNP   | INTERGENIC                 |                  |          |
| RG112 | AL123456_3 | 942479 T             | C                | none              | SNP   | INTERGENIC                 |                  |          |
| RG112 | AL123456_3 | 944862 G             | C                | none              | SNP   | INTERGENIC                 |                  |          |
| RG112 | AL123456_3 | 945214 G             | A                | Rv0848            | SNP   | NON_SYNONYMOUS_CODING      | Ggt/AgT          | G93S     |
| RG112 | AL123456_3 | 947429 T             | A                | Rv0850            | SNP   | NON_SYNONYMOUS_CODING      | Tcg/ACg          | S40T     |
| RG112 | AL123456_3 | 947430 C             | A                | Rv0850            | SNP   | STOP_GAINED                | tCb/tAg          | S40*     |
| RG112 | AL123456_3 | 949535 T             | C                | Rv0853c           | SNP   | SYNONYMOUS_CODING          | gAc/gcG          | A528     |
| RG112 | AL123456_3 | 955524 A             | G                | Rv0859            | SNP   | NON_SYNONYMOUS_CODING      | Agc/Ggc          | S150G    |
|       |            |                      |                  | AGCCGGGTTGGCCGGT  |       |                            |                  |          |
| RG112 | AL123456_3 | 968426 AGCCGGTGGCCGG | TGGCCGG          | Rv0872c           | INDEL | CODON_INSERTION            | -/CCGGCCAAC      | -602PAN  |
|       |            |                      |                  | TGGGGGGGGGG,TGGGG |       |                            |                  |          |
| RG112 | AL123456_3 | 976897 TGGGGGGGGG    | GGGGGGG          | Rv0878c           | INDEL | FRAME_SHIFT                | -/CC             | -433?    |
| RG112 | AL123456_3 | 979704 G             | C                | Rv0881            | SNP   | NON_SYNONYMOUS_CODING      | Ggc/Cgc          | G115R    |
| RG112 | AL123456_3 | 982061 G             | A                | Rv0884c           | SNP   | NON_SYNONYMOUS_CODING      | cCc/cTg          | P165L    |
| RG112 | AL123456_3 | 986463 G             | C                | none              | SNP   | INTERGENIC                 |                  |          |
| RG112 | AL123456_3 | 990001 G             | C                | Rv0890c           | SNP   | NON_SYNONYMOUS_CODING      | Ccc/Gcc          | P866A    |
| RG112 | AL123456_3 | 993346 A             | C                | Rv0891c           | SNP   | NON_SYNONYMOUS_CODING      | gTt/gTt          | V37G     |
| RG112 | AL123456_3 | 1012376 C            | T                | Rv0908            | SNP   | SYNONYMOUS_CODING          | Ctg/Tgt          | L216     |
| RG112 | AL123456_3 | 1016995 T            | C                | none              | SNP   | INTERGENIC                 |                  |          |
| RG112 | AL123456_3 | 1025106 T            | C                | Rv0919            | SNP   | SYNONYMOUS_CODING          | ttT/ttC          | F141     |
| RG112 | AL123456_3 | 1037012 T            | C                | Rv0930            | SNP   | NON_SYNONYMOUS_CODING      | aTg/aCg          | M5T      |
| RG112 | AL123456_3 | 1037911 C            | T                | Rv0930            | SNP   | STOP_GAINED                | Cga/Tga          | R305*    |
| RG112 | AL123456_3 | 1043344 C            | C                | Rv0935            | SNP   | NON_SYNONYMOUS_CODING      | Cgg/Ggg          | R16G     |
| RG112 | AL123456_3 | 1047165 T            | C                | Rv0938            | SNP   | NON_SYNONYMOUS_CODING      | Tgc/Cgc          | C344R    |
| RG112 | AL123456_3 | 1057788 T            | G                | Rv0948c           | SNP   | NON_SYNONYMOUS_CODING      | aAg/aCg          | K59T     |
| RG112 | AL123456_3 | 1068151 T            | C                | Rv0956            | SNP   | SYNONYMOUS_CODING          | caT/caC          | H197     |
| RG112 | AL123456_3 | 1068432 A            | G                | Rv0957            | SNP   | SYNONYMOUS_CODING          | ccA/ccG          | P76      |
| RG112 | AL123456_3 | 1070702 T            | C                | Rv0958            | SNP   | NON_SYNONYMOUS_CODING      | Tcc/Ccc          | S274P    |
| RG112 | AL123456_3 | 1073033 T            | G                | Rv0959            | SNP   | SYNONYMOUS_CODING          | ggT/ggG          | G593     |
| RG112 | AL123456_3 | 1074558 G            | A                | Rv0962c           | SNP   | NON_SYNONYMOUS_CODING      | cCc/cTc          | P186L    |
| RG112 | AL123456_3 | 1075279 T            | C                | none              | SNP   | INTERGENIC                 |                  |          |
| RG112 | AL123456_3 | 1076309 G            | T                | Rv0964c           | SNP   | NON_SYNONYMOUS_CODING      | Cct/Act          | P124T    |
| RG112 | AL123456_3 | 1077312 A            | G                | Rv0966c           | SNP   | NON_SYNONYMOUS_CODING      | gTg/gcG          | V175A    |
| RG112 | AL123456_3 | 1079927 C            | A                | Rv0969            | SNP   | SYNONYMOUS_CODING          | acC/acA          | T395     |
| RG112 | AL123456_3 | 1081681 T            | C                | Rv0970            | SNP   | SYNONYMOUS_CODING          | gtT/gtC          | V210     |
| RG112 | AL123456_3 | 1084462 C            | T                | Rv0973c           | SNP   | NON_SYNONYMOUS_CODING      | cGt/cAt          | R430H    |
| RG112 | AL123456_3 | 1087193 G            | C                | Rv0974c           | SNP   | NON_SYNONYMOUS_CODING      | aaC/aaG          | N51K     |
| RG112 | AL123456_3 | 1087279 T            | C                | Rv0974c           | SNP   | NON_SYNONYMOUS_CODING      | Aag/Gag          | K23E     |
| RG112 | AL123456_3 | 1093322 C            | T                | none              | SNP   | INTERGENIC                 |                  |          |
| RG112 | AL123456_3 | 1093406 A            | G                | Rv0978c           | SNP   | SYNONYMOUS_CODING          | gtT/gtC          | V317     |
| RG112 | AL123456_3 | 1095855 A            | G                | Rv0980c           | SNP   | SYNONYMOUS_CODING          | ggT/ggC          | G199     |
| RG112 | AL123456_3 | 1096398 C            | T                | Rv0980c           | SNP   | SYNONYMOUS_CODING          | gCc/gcG          | A18      |
| RG112 | AL123456_3 | 1100234 T            | C                | Rv0983            | SNP   | NON_SYNONYMOUS_CODING      | cTg/cGg          | L390P    |
| RG112 | AL123456_3 | 1103249 C            | T                | Rv0987            | SNP   | SYNONYMOUS_CODING          | gcC/gcT          | A236     |
| RG112 | AL123456_3 | 1106422 T            | C                | Rv0989c           | SNP   | NON_SYNONYMOUS_CODING      | Ata/Gta          | I321V    |
| RG112 | AL123456_3 | 1107434 A            | T                | none              | SNP   | INTERGENIC                 |                  |          |
| RG112 | AL123456_3 | 1107917 G            | T                | Rv0990c           | SNP   | NON_SYNONYMOUS_CODING      | caC/caA          | H61Q     |
| RG112 | AL123456_3 | 1109975 A            | G                | Rv0993            | SNP   | NON_SYNONYMOUS_CODING      | cAg/cGg          | Q235R    |
| RG112 | AL123456_3 | 1126889 G            | C                | Rv1007c           | SNP   | NON_SYNONYMOUS_CODING      | Cgc/Ggc          | R39G     |
| RG112 | AL123456_3 | 1127648 C            | A                | Rv1008            | SNP   | NON_SYNONYMOUS_CODING      | aCc/aAc          | T187N    |
| RG112 | AL123456_3 | 1142266 A            | C                | Rv1020            | SNP   | SYNONYMOUS_CODING          | ctA/ctC          | L1100    |
| RG112 | AL123456_3 | 1144664 G            | A                | Rv1023            | SNP   | NON_SYNONYMOUS_CODING      | cGg/cAg          | R34Q     |
| RG112 | AL123456_3 | 1149551 C            | T                | Rv1028c           | SNP   | SYNONYMOUS_CODING          | gaG/gaA          | E712     |
| RG112 | AL123456_3 | 1150585 G            | A                | Rv1028c           | SNP   | NON_SYNONYMOUS_CODING      | Ccc/Tcc          | P368S    |
| RG112 | AL123456_3 | 1159066 C            | T                | Rv1034c           | SNP   | NON_SYNONYMOUS_CODING      | cGg/cAg          | R81Q     |
| RG112 | AL123456_3 | 1161029 C            | G                | Rv1038c           | SNP   | SYNONYMOUS_CODING          | tcG/tCc          | S41      |
| RG112 | AL123456_3 | 1161032 G            | A                | Rv1038c           | SNP   | SYNONYMOUS_CODING          | atC/atT          | I40      |
| RG112 | AL123456_3 | 1162274 C            | T                | Rv1039c           | SNP   | NON_SYNONYMOUS_CODING      | Gcc/Acc          | A67T     |



|       |            |                          |            |         |       |                       |               |        |
|-------|------------|--------------------------|------------|---------|-------|-----------------------|---------------|--------|
| RG112 | AL123456_3 | 1651306 C                | T          | Rv1463  | SNP   | SYNONYMOUS_CODING     | gcC/gcT       | A197   |
| RG112 | AL123456_3 | 1676290 C                | A          | Rv1486c | SNP   | NON_SYNONYMOUS_CODING | aaG/aaT       | K198N  |
| RG112 | AL123456_3 | 1689349 C                | T          | Rv1498c | SNP   | NON_SYNONYMOUS_CODING | cCg/cAc       | R191H  |
| RG112 | AL123456_3 | 1692141 A                | C          | Rv1501  | SNP   | SYNONYMOUS_CODING     | atA/atC       | I84    |
| RG112 | AL123456_3 | 1692795 G                | C          | none    | SNP   | INTERGENIC            |               |        |
| RG112 | AL123456_3 | 1693561 A                | G          | Rv1502  | SNP   | NON_SYNONYMOUS_CODING | tAc/tGc       | Y213C  |
| RG112 | AL123456_3 | 1697399 T                | A          | Rv1507c | SNP   | NON_SYNONYMOUS_CODING | aTt/aAt       | I15N   |
| RG112 | AL123456_3 | 1698911 G                | A          | Rv1508c | SNP   | SYNONYMOUS_CODING     | ggC/ggT       | G328   |
| RG112 | AL123456_3 | 1705109 G                | C          | Rv1513  | SNP   | NON_SYNONYMOUS_CODING | Gtg/Ctg       | V18L   |
| RG112 | AL123456_3 | 1706119 T                | C          | Rv1514c | SNP   | SYNONYMOUS_CODING     | tcA/tcG       | S159   |
| RG112 | AL123456_3 | 1716627 G                | A          | Rv1522c | SNP   | NON_SYNONYMOUS_CODING | cCg/cTg       | P329L  |
| RG112 | AL123456_3 | 1718761 C                | T          | Rv1524  | SNP   | SYNONYMOUS_CODING     | ggC/ggT       | G12    |
| RG112 | AL123456_3 | 1728837 A                | G          | none    | SNP   | INTERGENIC            |               |        |
| RG112 | AL123456_3 | 1734994 C                | T          | Rv1534  | SNP   | SYNONYMOUS_CODING     | gcc/cgcT      | A87    |
| RG112 | AL123456_3 | 1740771 A                | C          | Rv1537  | SNP   | NON_SYNONYMOUS_CODING | Acc/Ccc       | T306P  |
| RG112 | AL123456_3 | 1752561 T                | C          | Rv1548c | SNP   | NON_SYNONYMOUS_CODING | gAc/gGc       | D258G  |
| RG112 | AL123456_3 | 1753519 GCCCC            | GCCCC      | Rv1549  | INDEL | FRAME_SHIFT           | -/C           | -5?    |
| RG112 | AL123456_3 | 1755519 G                | T          | Rv1551  | SNP   | NON_SYNONYMOUS_CODING | atG/atT       | M25I   |
| RG112 | AL123456_3 | 1759252 G                | T          | Rv1552  | SNP   | SYNONYMOUS_CODING     | tcG/tcT       | S524   |
| RG112 | AL123456_3 | 1760165 G                | A          | Rv1553  | SNP   | STOP_GAINED           | tGg/tAg       | W244*  |
| RG112 | AL123456_3 | 1760292 A                | A          | Rv1554  | SNP   | NON_SYNONYMOUS_CODING | Atg/Gtg       | M40V   |
| RG112 | AL123456_3 | 1772892 T                | C          | Rv1565c | SNP   | NON_SYNONYMOUS_CODING | gAc/gGc       | D313G  |
| RG112 | AL123456_3 | 1777213 C                | G          | Rv1569  | SNP   | NON_SYNONYMOUS_CODING | gCc/gGc       | A171G  |
| RG112 | AL123456_3 | 1778430 T                | C          | Rv1570  | SNP   | NON_SYNONYMOUS_CODING | aTg/aCg       | M191T  |
| RG112 | AL123456_3 | 1779243 T                | G          | Rv1572c | SNP   | NON_SYNONYMOUS_CODING | cAc/cCc       | H19P   |
| RG112 | AL123456_3 | 1793769 C                | T          | none    | SNP   | INTERGENIC            |               |        |
| RG112 | AL123456_3 | 1794883 A                | G          | Rv1594  | SNP   | NON_SYNONYMOUS_CODING | cAt/cTc       | H43R   |
| RG112 | AL123456_3 | 1797027 C                | T          | Rv1595  | SNP   | NON_SYNONYMOUS_CODING | aCc/aTt       | T408I  |
| RG112 | AL123456_3 | 1798355 G                | A          | Rv1597  | SNP   | NON_SYNONYMOUS_CODING | gGt/gAt       | G21D   |
| RG112 | AL123456_3 | 1803265 G                | A          | Rv1602  | SNP   | NON_SYNONYMOUS_CODING | aGc/aAc       | S201N  |
| RG112 | AL123456_3 | 1804409 C                | A          | Rv1604  | SNP   | NON_SYNONYMOUS_CODING | cCa/cAa       | P124Q  |
| RG112 | AL123456_3 | 1805948 C                | T          | Rv1606  | SNP   | NON_SYNONYMOUS_CODING | aCc/aTt       | T99I   |
| RG112 | AL123456_3 | 1810353 G                | A          | Rv1611  | SNP   | SYNONYMOUS_CODING     | ccG/ccA       | P38    |
| RG112 | AL123456_3 | 1815604 G                | A          | Rv1615  | SNP   | NON_SYNONYMOUS_CODING | Gcc/Acc       | A118T  |
| RG112 | AL123456_3 | 1817976 A                | T          | Rv1618  | SNP   | NON_SYNONYMOUS_CODING | cAc/cTt       | H121L  |
| RG112 | AL123456_3 | 1836286 G                | C          | none    | SNP   | INTERGENIC            |               |        |
| RG112 | AL123456_3 | 1847919 C                | G          | Rv1639c | SNP   | SYNONYMOUS_CODING     | acG/acC       | T180   |
| RG112 | AL123456_3 | 1854300 T                | C          | Rv1644  | SNP   | NON_SYNONYMOUS_CODING | cTg/cCg       | L232P  |
| RG112 | AL123456_3 | 1856777 G                | C          | Rv1647  | SNP   | NON_SYNONYMOUS_CODING | Gcg/Ccg       | A2P    |
| RG112 | AL123456_3 | 1882551 G                | C          | Rv1662  | SNP   | NON_SYNONYMOUS_CODING | cGg/cCg       | R283P  |
| RG112 | AL123456_3 | 1882965 T                | C          | Rv1662  | SNP   | NON_SYNONYMOUS_CODING | tTg/tCg       | L421S  |
| RG112 | AL123456_3 | 1885115 C                | T          | Rv1662  | SNP   | STOP_GAINED           | Caa/Taa       | Q1138* |
| RG112 | AL123456_3 | 1885772 G                | A          | Rv1662  | SNP   | NON_SYNONYMOUS_CODING | Gcc/Aac       | A1357T |
| RG112 | AL123456_3 | 1891437 T                | C          | Rv1665  | SNP   | NON_SYNONYMOUS_CODING | aTc/aCc       | I71T   |
| RG112 | AL123456_3 | 1894301 G                | GT         | Rv1668c | INDEL | FRAME_SHIFT           | -/A           | -347?  |
| RG112 | AL123456_3 | 1895174 C                | C          | Rv1668c | SNP   | NON_SYNONYMOUS_CODING | Gac/Aac       | D57N   |
| RG112 | AL123456_3 | 1899351 T                | C          | Rv1674c | SNP   | NON_SYNONYMOUS_CODING | gAa/gGa       | E189G  |
| RG112 | AL123456_3 | 1901493 T                | C          | Rv1676  | SNP   | SYNONYMOUS_CODING     | agT/agC       | S149   |
| RG112 | AL123456_3 | 1907296 G                | C          | Rv1682  | SNP   | SYNONYMOUS_CODING     | gcG/gcC       | A298   |
| RG112 | AL123456_3 | 1917972 A                | G          | Rv1694  | SNP   | SYNONYMOUS_CODING     | ctA/ctG       | L11    |
| RG112 | AL123456_3 | 1931179 C                | A          | Rv1704c | SNP   | NON_SYNONYMOUS_CODING | cGg/cTg       | R93L   |
| RG112 | AL123456_3 | 1931769 C                | T          | Rv1705c | SNP   | NON_SYNONYMOUS_CODING | Gga/Aga       | G296R  |
| RG112 | AL123456_3 | 1933988 G                | A          | none    | SNP   | INTERGENIC            |               |        |
| RG112 | AL123456_3 | 1943039 C                | T          | Rv1715  | SNP   | SYNONYMOUS_CODING     | atC/atT       | I127   |
| RG112 | AL123456_3 | 1943592 C                | T          | Rv1716  | SNP   | NON_SYNONYMOUS_CODING | cCc/cTt       | P6L    |
| RG112 | AL123456_3 | 1944107 A                | G          | Rv1716  | SNP   | NON_SYNONYMOUS_CODING | AgT/agC       | S178G  |
| RG112 | AL123456_3 | 1944402 T                | C          | Rv1716  | SNP   | NON_SYNONYMOUS_CODING | gTc/gTc       | V276A  |
| RG112 | AL123456_3 | 1947903 G                | C          | Rv1722  | SNP   | NON_SYNONYMOUS_CODING | Gtg/Ttg       | V15L   |
| RG112 | AL123456_3 | 1950767 T                | C          | Rv1724c | SNP   | SYNONYMOUS_CODING     | aaA/aaG       | K95    |
| RG112 | AL123456_3 | 1960284 C                | A          | Rv1733c | SNP   | NON_SYNONYMOUS_CODING | caG/caT       | Q68H   |
| RG112 | AL123456_3 | 1967237 C                | A          | Rv1739c | SNP   | NON_SYNONYMOUS_CODING | cGa/cTa       | R134L  |
| RG112 | AL123456_3 | 1981056 C                | T          | none    | SNP   | INTERGENIC            |               |        |
| RG112 | AL123456_3 | 1983313 T                | G          | Rv1753c | SNP   | NON_SYNONYMOUS_CODING | aAc/aCc       | N488T  |
| RG112 | AL123456_3 | 1986625 TCATC            | TTGCATC    | Rv1754c | INDEL | FRAME_SHIFT           | -/CA          | -15?   |
|       |            | AGAGAGGACTTCATCGAT       |            |         |       |                       |               |        |
| RG112 | AL123456_3 | 1989057 GCGCTG           | AG         | Rv1758  | INDEL | FRAME_SHIFT           | -             | -6     |
| RG112 | AL123456_3 | 1990919 G                | C          | Rv1759c | SNP   | NON_SYNONYMOUS_CODING | ttC/ttG       | F553L  |
| RG112 | AL123456_3 | 1993808 A                | T          | Rv1760  | SNP   | NON_SYNONYMOUS_CODING | gAg/gTg       | E219V  |
| RG112 | AL123456_3 | 1993821 G                | C          | Rv1760  | SNP   | SYNONYMOUS_CODING     | tcG/tcc       | S223   |
| RG112 | AL123456_3 | 1996100 C                | CAGT       | none    | INDEL | INTERGENIC            |               |        |
| RG112 | AL123456_3 | 2014333 C                | T          | Rv1779c | SNP   | SYNONYMOUS_CODING     | gtG/gtA       | V49    |
| RG112 | AL123456_3 | 2022868 T                | C          | Rv1783  | SNP   | SYNONYMOUS_CODING     | agT/agC       | S1204  |
| RG112 | AL123456_3 | 2026008 C                | G          | Rv1787  | SNP   | NON_SYNONYMOUS_CODING | ttC/ttG       | F236L  |
| RG112 | AL123456_3 | 2026031 TC               | T          | Rv1787  | INDEL | FRAME_SHIFT           | -             | -244   |
| RG112 | AL123456_3 | 2030942 G                | A          | Rv1793  | SNP   | SYNONYMOUS_CODING     | gcG/gcA       | A83    |
| RG112 | AL123456_3 | 2037716 T                | C          | Rv1798  | SNP   | SYNONYMOUS_CODING     | cgt/cgC       | R339   |
| RG112 | AL123456_3 | 2041409 A                | G          | Rv1800  | SNP   | NON_SYNONYMOUS_CODING | Att/Gtt       | I653V  |
| RG112 | AL123456_3 | 2045310 A                | G          | Rv1803c | SNP   | SYNONYMOUS_CODING     | atT/atC       | I511   |
| RG112 | AL123456_3 | 2049065 T                | C          | Rv1807  | SNP   | NON_SYNONYMOUS_CODING | tTt/tCc       | F223S  |
| RG112 | AL123456_3 | 2049097 G                | C          | Rv1807  | SNP   | NON_SYNONYMOUS_CODING | Gtc/Ctc       | V234L  |
| RG112 | AL123456_3 | 2051746 T                | C          | Rv1809  | SNP   | SYNONYMOUS_CODING     | gcT/gcC       | A155   |
| RG112 | AL123456_3 | 2052035 G                | T          | Rv1809  | SNP   | NON_SYNONYMOUS_CODING | Gtg/Ttg       | V252L  |
| RG112 | AL123456_3 | 2053411 G                | C          | none    | SNP   | INTERGENIC            |               |        |
| RG112 | AL123456_3 | 2053682 C                | T          | Rv1811  | SNP   | SYNONYMOUS_CODING     | atC/atT       | I80    |
| RG112 | AL123456_3 | 2054025 G                | T          | Rv1811  | SNP   | NON_SYNONYMOUS_CODING | Gcc/Tcc       | A195S  |
| RG112 | AL123456_3 | 2055271 A                | G          | Rv1812c | SNP   | NON_SYNONYMOUS_CODING | cTa/cCa       | L30P   |
| RG112 | AL123456_3 | 2057774 A                | T          | Rv1815  | SNP   | NON_SYNONYMOUS_CODING | Atc/Ttc       | I83F   |
| RG112 | AL123456_3 | 2068080 G                | A          | Rv1821  | SNP   | NON_SYNONYMOUS_CODING | Gac/Aac       | D542N  |
| RG112 | AL123456_3 | 2074509 C                | G          | none    | SNP   | INTERGENIC            |               |        |
| RG112 | AL123456_3 | 2074565 C                | G          | none    | SNP   | INTERGENIC            |               |        |
| RG112 | AL123456_3 | 2077253 G                | A          | Rv1832  | SNP   | SYNONYMOUS_CODING     | acG/acA       | T459   |
| RG112 | AL123456_3 | 2094911 ACAGCGTCAGCGTCAG | ACAGCGTCAG | Rv1844c | INDEL | CODON_DELETION        | actgacgct/act | TDA88T |
| RG112 | AL123456_3 | 2096186 A                | G          | Rv1846c | SNP   | SYNONYMOUS_CODING     | act/acC       | T138   |
| RG112 | AL123456_3 | 2097990 A                | C          | Rv1850  | SNP   | SYNONYMOUS_CODING     | gcA/gcC       | A10    |
| RG112 | AL123456_3 | 2100658 G                | C          | Rv1852  | SNP   | NON_SYNONYMOUS_CODING | Gac/Tac       | D107Y  |
| RG112 | AL123456_3 | 2108141 T                | T          | Rv1860  | SNP   | NON_SYNONYMOUS_CODING | Ttc/Ctc       | F136L  |
| RG112 | AL123456_3 | 2116903 C                | T          | Rv1867  | SNP   | SYNONYMOUS_CODING     | ggC/ggT       | G380   |
| RG112 | AL123456_3 | 2123169 T                | G          | none    | SNP   | INTERGENIC            |               |        |
| RG112 | AL123456_3 | 2128870 A                | G          | Rv1878  | SNP   | SYNONYMOUS_CODING     | ctA/ctG       | L283   |
| RG112 | AL123456_3 | 2128908 C                | T          | Rv1878  | SNP   | NON_SYNONYMOUS_CODING | tCc/ttC       | S296F  |
| RG112 | AL123456_3 | 2131639 C                | T          | Rv1880c | SNP   | SYNONYMOUS_CODING     | ctG/ctA       | L73    |





|       |            |                 |                    |         |       |                       |                    |            |  |
|-------|------------|-----------------|--------------------|---------|-------|-----------------------|--------------------|------------|--|
| RG112 | AL123456_3 | 2598400 A       | G                  | Rv2326c | SNP   | SYNONYMOUS_CODING     | aaT/aaC            | N516       |  |
| RG112 | AL123456_3 | 2605826 A       | C                  | Rv2332  | SNP   | NON_SYNONYMOUS_CODING | gAg/gCc            | E240A      |  |
| RG112 | AL123456_3 | 2612632 C       | A                  | Rv2337c | SNP   | NON_SYNONYMOUS_CODING | gGc/gTc            | G119V      |  |
| RG112 | AL123456_3 | 2621058 G       | A                  | Rv2343c | SNP   | SYNONYMOUS_CODING     | ccC/ccT            | P465       |  |
| RG112 | AL123456_3 | 2641556 A       | C                  | Rv2358  | SNP   | NON_SYNONYMOUS_CODING | gAg/gGc            | E104A      |  |
| RG112 | AL123456_3 | 2654371 G       | A                  | Rv2374c | SNP   | SYNONYMOUS_CODING     | aaC/aaT            | N241       |  |
| RG112 | AL123456_3 | 2656225 A       | G                  | Rv2377c | SNP   | NON_SYNONYMOUS_CODING | gTc/gCc            | V69A       |  |
| RG112 | AL123456_3 | 2660319 C       | G                  | Rv2379c | SNP   | NON_SYNONYMOUS_CODING | gaG/gaC            | E589D      |  |
| RG112 | AL123456_3 | 2680658 T       | G                  | none    | SNP   | INTERGENIC            |                    |            |  |
| RG112 | AL123456_3 | 2683137 G       | A                  | Rv2388c | SNP   | SYNONYMOUS_CODING     | ccC/ccT            | P2         |  |
| RG112 | AL123456_3 | 2695378 C       | G                  | Rv2398c | SNP   | NON_SYNONYMOUS_CODING | gGc/gCc            | G141A      |  |
|       |            |                 | ACAGCGACCATATCGCGG |         |       |                       |                    |            |  |
| RG112 | AL123456_3 | 2704884 AC      | AGCTC              | Rv2407  | INDEL | CODON_INSERTION       | -/AGCGACCATATCGCCG | -64SDHIAEI |  |
| RG112 | AL123456_3 | 2713795 C       | T                  | none    | SNP   | INTERGENIC            |                    |            |  |
| RG112 | AL123456_3 | 2718852 T       | G                  | none    | SNP   | INTERGENIC            |                    |            |  |
| RG112 | AL123456_3 | 2734074 T       | C                  | Rv2436  | SNP   | NON_SYNONYMOUS_CODING | gTc/gCc            | V282A      |  |
| RG112 | AL123456_3 | 2736434 C       | A                  | Rv2438c | SNP   | NON_SYNONYMOUS_CODING | cGg/cTg            | R133L      |  |
| RG112 | AL123456_3 | 2745041 G       | T                  | none    | SNP   | INTERGENIC            |                    |            |  |
| RG112 | AL123456_3 | 2745889 C       | T                  | Rv2446c | SNP   | NON_SYNONYMOUS_CODING | Gcc/Acc            | A84T       |  |
| RG112 | AL123456_3 | 2751804 C       | A                  | Rv2450c | SNP   | NON_SYNONYMOUS_CODING | cGg/cAg            | R126Q      |  |
| RG112 | AL123456_3 | 2752698 C       | T                  | none    | SNP   | INTERGENIC            |                    |            |  |
| RG112 | AL123456_3 | 2760152 A       | G                  | Rv2458  | SNP   | NON_SYNONYMOUS_CODING | tAc/tGc            | Y125C      |  |
| RG112 | AL123456_3 | 2779136 T       | C                  | Rv2476c | SNP   | NON_SYNONYMOUS_CODING | Agc/Ggc            | S1043G     |  |
| RG112 | AL123456_3 | 2784613 A       | G                  | none    | SNP   | INTERGENIC            |                    |            |  |
| RG112 | AL123456_3 | 2786952 A       | G                  | Rv2482c | SNP   | NON_SYNONYMOUS_CODING | Tgc/Cgc            | C778R      |  |
| RG112 | AL123456_3 | 2809362 G       | T                  | Rv2495c | SNP   | NON_SYNONYMOUS_CODING | gCc/gAc            | A193D      |  |
| RG112 | AL123456_3 | 2809621 T       | C                  | Rv2495c | SNP   | NON_SYNONYMOUS_CODING | Acc/Gcc            | T107A      |  |
| RG112 | AL123456_3 | 2814961 G       | A                  | Rv2501c | SNP   | SYNONYMOUS_CODING     | ggC/ggT            | G640       |  |
| RG112 | AL123456_3 | 2818837 A       | G                  | Rv2503c | SNP   | SYNONYMOUS_CODING     | ggT/ggC            | G97        |  |
| RG112 | AL123456_3 | 2820548 C       | T                  | Rv2505c | SNP   | NON_SYNONYMOUS_CODING | cGc/cAc            | R350H      |  |
| RG112 | AL123456_3 | 2821342 C       | T                  | Rv2505c | SNP   | SYNONYMOUS_CODING     | gcG/gcA            | A85        |  |
| RG112 | AL123456_3 | 2827984 G       | T                  | none    | SNP   | INTERGENIC            |                    |            |  |
| RG112 | AL123456_3 | 2828019 T       | C                  | none    | SNP   | INTERGENIC            |                    |            |  |
| RG112 | AL123456_3 | 2830525 C       | A                  | Rv2513  | SNP   | NON_SYNONYMOUS_CODING | aCg/aAg            | T122K      |  |
| RG112 | AL123456_3 | 2839983 G       | A                  | none    | SNP   | INTERGENIC            |                    |            |  |
| RG112 | AL123456_3 | 2844132 G       | T                  | Rv2524c | SNP   | NON_SYNONYMOUS_CODING | cCg/cAg            | P1734Q     |  |
| RG112 | AL123456_3 | 2855259 A       | G                  | Rv2531c | SNP   | SYNONYMOUS_CODING     | gCt/gcT            | A841       |  |
| RG112 | AL123456_3 | 2858835 G       | A                  | Rv2534c | SNP   | SYNONYMOUS_CODING     | gcC/gcT            | A152       |  |
| RG112 | AL123456_3 | 2865760 A       | G                  | Rv2542  | SNP   | NON_SYNONYMOUS_CODING | Acc/Gcc            | T211A      |  |
| RG112 | AL123456_3 | 2865882 T       | C                  | Rv2542  | SNP   | SYNONYMOUS_CODING     | gtT/gtC            | V251       |  |
| RG112 | AL123456_3 | 2871048 C       | T                  | Rv2551c | SNP   | SYNONYMOUS_CODING     | ctG/ctA            | L49        |  |
| RG112 | AL123456_3 | 2877399 G       | A                  | Rv2557  | SNP   | NON_SYNONYMOUS_CODING | Ggc/Agc            | A110T      |  |
| RG112 | AL123456_3 | 2880702 G       | C                  | Rv2560  | SNP   | NON_SYNONYMOUS_CODING | Gtc/Ctc            | V210L      |  |
| RG112 | AL123456_3 | 2881455 A       | G                  | Rv2561  | SNP   | NON_SYNONYMOUS_CODING | tAc/tGc            | Y16C       |  |
| RG112 | AL123456_3 | 2881597 AGGGGGG | AGGGGG             | Rv2561  | INDEL | FRAME_SHIFT           | -                  | -65        |  |
| RG112 | AL123456_3 | 2881631 GCCCC   | GCCCC              | Rv2561  | INDEL | FRAME_SHIFT           | -                  | -76        |  |
| RG112 | AL123456_3 | 2885649 G       | T                  | Rv2565  | SNP   | NON_SYNONYMOUS_CODING | Gct/Tct            | A347S      |  |
| RG112 | AL123456_3 | 2888201 T       | C                  | Rv2566  | SNP   | NON_SYNONYMOUS_CODING | cTc/cCc            | L610P      |  |
| RG112 | AL123456_3 | 2889633 T       | C                  | Rv2566  | SNP   | SYNONYMOUS_CODING     | gCt/gcC            | A108T      |  |
| RG112 | AL123456_3 | 2891267 C       | T                  | Rv2567  | SNP   | SYNONYMOUS_CODING     | ggC/ggT            | G491       |  |
| RG112 | AL123456_3 | 2891728 A       | G                  | Rv2567  | SNP   | NON_SYNONYMOUS_CODING | cAg/ccG            | Q645R      |  |
| RG112 | AL123456_3 | 2893238 C       | A                  | Rv2568c | SNP   | SYNONYMOUS_CODING     | cgG/cgT            | R78        |  |
| RG112 | AL123456_3 | 2894208 G       | A                  | Rv2569c | SNP   | SYNONYMOUS_CODING     | agC/agT            | S67        |  |
| RG112 | AL123456_3 | 2910461 G       | T                  | Rv2584c | SNP   | NON_SYNONYMOUS_CODING | gCb/gAg            | A147E      |  |
| RG112 | AL123456_3 | 2911293 C       | G                  | Rv2585c | SNP   | NON_SYNONYMOUS_CODING | tGt/tCt            | C462S      |  |
| RG112 | AL123456_3 | 2912294 T       | G                  | Rv2585c | SNP   | SYNONYMOUS_CODING     | gcA/gcC            | A128       |  |
| RG112 | AL123456_3 | 2923391 T       | C                  | Rv2592c | SNP   | SYNONYMOUS_CODING     | ccA/ccG            | P281       |  |
| RG112 | AL123456_3 | 2927939 T       | C                  | none    | SNP   | INTERGENIC            |                    |            |  |
| RG112 | AL123456_3 | 2939373 G       | C                  | Rv2611c | SNP   | NON_SYNONYMOUS_CODING | tCt/tGt            | S197C      |  |
| RG112 | AL123456_3 | 2939657 T       | C                  | Rv2611c | SNP   | NON_SYNONYMOUS_CODING | atA/atG            | I102M      |  |
| RG112 | AL123456_3 | 2954439 T       | C                  | Rv2627c | SNP   | NON_SYNONYMOUS_CODING | Agg/Ggg            | R104G      |  |
| RG112 | AL123456_3 | 2960231 G       | T                  | Rv2634c | SNP   | SYNONYMOUS_CODING     | ggC/ggA            | G737       |  |
| RG112 | AL123456_3 | 2968913 T       | C                  | none    | SNP   | INTERGENIC            |                    |            |  |
| RG112 | AL123456_3 | 2972108 G       | A                  | none    | SNP   | INTERGENIC            |                    |            |  |
| RG112 | AL123456_3 | 2973463 ATC     | ATCTTC             | none    | INDEL | INTERGENIC            |                    |            |  |
| RG112 | AL123456_3 | 2974933 A       | G                  | Rv2650c | SNP   | NON_SYNONYMOUS_CODING | aTc/aCc            | I101T      |  |
| RG112 | AL123456_3 | 2976313 A       | G                  | Rv2652c | SNP   | NON_SYNONYMOUS_CODING | tTc/tCc            | F81S       |  |
| RG112 | AL123456_3 | 2984740 A       | G                  | Rv2668  | SNP   | NON_SYNONYMOUS_CODING | cAc/cGc            | H3R        |  |
| RG112 | AL123456_3 | 2991916 A       | G                  | Rv2675c | SNP   | SYNONYMOUS_CODING     | ccT/ccC            | P7         |  |
| RG112 | AL123456_3 | 2996026 A       | C                  | none    | SNP   | INTERGENIC            |                    |            |  |
| RG112 | AL123456_3 | 3004091 G       | A                  | Rv2687c | SNP   | NON_SYNONYMOUS_CODING | Cgg/Tgg            | R220W      |  |
| RG112 | AL123456_3 | 3005185 G       | T                  | Rv2688c | SNP   | NON_SYNONYMOUS_CODING | Ccc/Acc            | P156T      |  |
| RG112 | AL123456_3 | 3009692 A       | G                  | Rv2691  | SNP   | NON_SYNONYMOUS_CODING | Acc/Gcc            | T117A      |  |
| RG112 | AL123456_3 | 3017465 T       | C                  | Rv2702  | SNP   | NON_SYNONYMOUS_CODING | aTa/aCa            | I203T      |  |
| RG112 | AL123456_3 | 3029610 G       | A                  | Rv2716  | SNP   | NON_SYNONYMOUS_CODING | Gcg/Agc            | A147T      |  |
| RG112 | AL123456_3 | 3040838 C       | T                  | Rv2728c | SNP   | SYNONYMOUS_CODING     | ccG/ccA            | P208       |  |
| RG112 | AL123456_3 | 3041871 G       | T                  | Rv2729c | SNP   | NON_SYNONYMOUS_CODING | gCg/gAg            | A202E      |  |
| RG112 | AL123456_3 | 3054081 A       | G                  | Rv2741  | SNP   | SYNONYMOUS_CODING     | ggA/ggG            | G56        |  |
| RG112 | AL123456_3 | 3054321 A       | G                  | Rv2741  | SNP   | SYNONYMOUS_CODING     | ggA/ggG            | G136       |  |
| RG112 | AL123456_3 | 3061615 T       | C                  | Rv2748c | SNP   | NON_SYNONYMOUS_CODING | Atg/Gtg            | M298V      |  |
| RG112 | AL123456_3 | 3068647 C       | T                  | Rv2756c | SNP   | SYNONYMOUS_CODING     | ttG/ttA            | L479       |  |
| RG112 | AL123456_3 | 3073868 T       | C                  | Rv2764c | SNP   | NON_SYNONYMOUS_CODING | Acc/Gcc            | T202A      |  |
| RG112 | AL123456_3 | 3077039 C       | A                  | Rv2768c | SNP   | NON_SYNONYMOUS_CODING | gGc/gTc            | G347V      |  |
| RG112 | AL123456_3 | 3080795 A       | G                  | Rv2771c | SNP   | NON_SYNONYMOUS_CODING | cTc/cCc            | L80P       |  |
| RG112 | AL123456_3 | 3086788 T       | C                  | none    | SNP   | INTERGENIC            |                    |            |  |
| RG112 | AL123456_3 | 3095331 G       | A                  | Rv2787  | SNP   | NON_SYNONYMOUS_CODING | cGc/cAc            | R74H       |  |
| RG112 | AL123456_3 | 3101119 G       | T                  | Rv2791c | SNP   | NON_SYNONYMOUS_CODING | Cgc/Agc            | R155S      |  |
| RG112 | AL123456_3 | 3103682 T       | C                  | Rv2794c | SNP   | NON_SYNONYMOUS_CODING | Atg/Gtg            | M87V       |  |
| RG112 | AL123456_3 | 3106033 C       | T                  | Rv2797c | SNP   | SYNONYMOUS_CODING     | gtG/gtA            | V425       |  |
| RG112 | AL123456_3 | 3108055 C       | T                  | Rv2799  | SNP   | SYNONYMOUS_CODING     | gCc/gcT            | A96        |  |
| RG112 | AL123456_3 | 3108674 A       | C                  | Rv2800  | SNP   | SYNONYMOUS_CODING     | Agg/Cgg            | R87        |  |
| RG112 | AL123456_3 | 3113872 A       | T                  | Rv2807  | SNP   | NON_SYNONYMOUS_CODING | gAg/gTg            | E72V       |  |
| RG112 | AL123456_3 | 3120214 TT      | TTTCAT             | none    | INDEL | INTERGENIC            |                    |            |  |
| RG112 | AL123456_3 | 3131469 TTGT    | TTGTCCGCATGT       | Rv2823c | INDEL | CODON_INSERTION       | -/ACATCGCCG        | -101TSP    |  |
| RG112 | AL123456_3 | 3133536 T       | C                  | Rv2825c | SNP   | NON_SYNONYMOUS_CODING | Aaa/Gaa            | K2E        |  |
| RG112 | AL123456_3 | 3137058 G       | A                  | Rv2830c | SNP   | NON_SYNONYMOUS_CODING | gCb/gTg            | A56V       |  |
| RG112 | AL123456_3 | 3162805 C       | G                  | Rv2853  | SNP   | NON_SYNONYMOUS_CODING | Cgc/Ggc            | R180G      |  |
| RG112 | AL123456_3 | 3165074 T       | C                  | Rv2854  | SNP   | NON_SYNONYMOUS_CODING | gTg/gCg            | V308A      |  |
| RG112 | AL123456_3 | 3175702 T       | C                  | Rv2864c | SNP   | NON_SYNONYMOUS_CODING | Atc/Gtc            | I522V      |  |
| RG112 | AL123456_3 | 3177884 C       | A                  | Rv2866  | SNP   | SYNONYMOUS_CODING     | cgC/cgA            | R21        |  |
| RG112 | AL123456_3 | 3178445 C       | G                  | none    | SNP   | INTERGENIC            |                    |            |  |



|                    |            |                       |                   |         |       |                            |                     |           |
|--------------------|------------|-----------------------|-------------------|---------|-------|----------------------------|---------------------|-----------|
| RG112              | AL123456_3 | 3730519 C             | G                 | Rv3343c | SNP   | SYNONYMOUS_CODING          | acG/acC             | T2139     |
| RG112              | AL123456_3 | 3730789 A             | G                 | Rv3343c | SNP   | SYNONYMOUS_CODING          | atT/atC             | I2049     |
| RG112              | AL123456_3 | 3732370 A             | G                 | Rv3343c | SNP   | SYNONYMOUS_CODING          | aaT/aaC             | N1522     |
| RG112              | AL123456_3 | 3732517 A             | G                 | Rv3343c | SNP   | SYNONYMOUS_CODING          | atT/atC             | I1473     |
| RG112              | AL123456_3 | 3732553 A             | G                 | Rv3343c | SNP   | SYNONYMOUS_CODING          | atT/atC             | I1461     |
| RG112              | AL123456_3 | 3735967 G             | A                 | Rv3343c | SNP   | SYNONYMOUS_CODING          | tcC/tcT             | S323      |
| RG112              | AL123456_3 | 3736628 T             | G                 | Rv3343c | SNP   | NON_SYNONYMOUS_CODING      | gAg/gcG             | E103A     |
| RG112              | AL123456_3 | 3737120 T             | C                 | Rv3344c | SNP   | NON_SYNONYMOUS_CODING      | gAc/gcG             | D440G     |
| RG112              | AL123456_3 | 3737638 G             | C                 | Rv3344c | SNP   | SYNONYMOUS_CODING          | tcC/tcG             | S267      |
| RG112              | AL123456_3 | 3739913 G             | A                 | Rv3345c | SNP   | SYNONYMOUS_CODING          | acC/acT             | T954      |
| RG112              | AL123456_3 | 3740555 G             | GCC               | Rv3345c | INDEL | FRAME_SHIFT                | -/GG                | -740?     |
| GCCTTGCCGCCGTACCCG |            |                       |                   |         |       |                            |                     |           |
| RG112              | AL123456_3 | 3741267 CCCTTGCCGCCGT | GCCTTGCCGCCGT     | Rv3345c | INDEL | CODON_DELETION             | aacggcggcaaggcggtga | NGKGGGD-  |
| RG112              | AL123456_3 | 3746409 A             | G                 | Rv3347c | SNP   | NON_SYNONYMOUS_CODING      | ctG/cCG             | L2259P    |
| RG112              | AL123456_3 | 3752207 A             | G                 | Rv3347c | SNP   | SYNONYMOUS_CODING          | atT/atC             | I326      |
| RG112              | AL123456_3 | 3753116 C             | T                 | Rv3347c | SNP   | SYNONYMOUS_CODING          | ccG/ccA             | P23       |
| RG112              | AL123456_3 | 3753164 T             | G                 | Rv3347c | SNP   | SYNONYMOUS_CODING          | ccA/ccC             | P7        |
| RG112              | AL123456_3 | 3776706 C             | T                 | Rv3365c | SNP   | NON_SYNONYMOUS_CODING      | Gcg/Acg             | A266T     |
| CGGCAACGGTGGCAACG  |            |                       |                   |         |       |                            |                     |           |
| CGGCAACGGTGGCAACG  |            |                       |                   |         |       |                            |                     |           |
| RG112              | AL123456_3 | 3779671 GTGGCAACGGT   | GTGGCAACGGTGGCAAC | Rv3367  | INDEL | CODON_CHANGE_PLUS_CODON_IN | gcc/gGCAACGCTGcc    | A378GNGA  |
| RG112              | AL123456_3 | 3794884 G             | A                 | none    | SNP   | INTERGENIC                 |                     |           |
| RG112              | AL123456_3 | 3796409 TTCA          | T                 | none    | INDEL | INTERGENIC                 |                     |           |
| RG112              | AL123456_3 | 3798095 A             | C                 | Rv3383c | SNP   | NON_SYNONYMOUS_CODING      | gTc/gGc             | V132G     |
| RG112              | AL123456_3 | 3816110 G             | A                 | none    | SNP   | INTERGENIC                 |                     |           |
| RG112              | AL123456_3 | 3817117 C             | A                 | Rv3399  | SNP   | NON_SYNONYMOUS_CODING      | gCg/gAg             | A330E     |
| RG112              | AL123456_3 | 3817695 G             | A                 | Rv3400  | SNP   | NON_SYNONYMOUS_CODING      | Gtg/Atg             | V153M     |
| RG112              | AL123456_3 | 3823159 A             | T                 | Rv3403c | SNP   | SYNONYMOUS_CODING          | gtT/gTA             | V235      |
| RG112              | AL123456_3 | 3825560 C             | G                 | Rv3406  | SNP   | SYNONYMOUS_CODING          | ctC/ctG             | L77       |
| RG112              | AL123456_3 | 3826684 C             | T                 | Rv3408  | SNP   | NON_SYNONYMOUS_CODING      | tCg/tTG             | S46L      |
| RG112              | AL123456_3 | 3829770 T             | C                 | Rv3410c | SNP   | SYNONYMOUS_CODING          | ccA/ccG             | P47       |
| RG112              | AL123456_3 | 3838480 C             | T                 | Rv3419c | SNP   | NON_SYNONYMOUS_CODING      | aGt/aAT             | S37N      |
| RG112              | AL123456_3 | 3838643 G             | A                 | Rv3420c | SNP   | SYNONYMOUS_CODING          | taC/taT             | Y140      |
| RG112              | AL123456_3 | 3838871 A             | G                 | Rv3420c | SNP   | SYNONYMOUS_CODING          | gCT/gCC             | A64       |
| RG112              | AL123456_3 | 3842384 A             | G                 | Rv3425  | SNP   | NON_SYNONYMOUS_CODING      | gAc/gAc             | D49G      |
| RG112              | AL123456_3 | 3842425 T             | A                 | Rv3425  | SNP   | NON_SYNONYMOUS_CODING      | Ttg/Atg             | L63M      |
| RG112              | AL123456_3 | 3842620 A             | G                 | Rv3425  | SNP   | NON_SYNONYMOUS_CODING      | Act/Gct             | T128A     |
| RG112              | AL123456_3 | 3842625 A             | G                 | Rv3425  | SNP   | SYNONYMOUS_CODING          | ccA/ccG             | P129      |
| RG112              | AL123456_3 | 3843407 CGGGGG        | CGGGGG            | Rv3426  | INDEL | FRAME_SHIFT                | -                   | -126      |
| RG112              | AL123456_3 | 3844992 T             | A                 | Rv3428c | SNP   | NON_SYNONYMOUS_CODING      | Agc/Tgc             | S327C     |
| RG112              | AL123456_3 | 3850197 G             | A                 | none    | SNP   | INTERGENIC                 |                     |           |
| RG112              | AL123456_3 | 3859376 C             | T                 | Rv3439c | SNP   | NON_SYNONYMOUS_CODING      | gGg/gAg             | G96E      |
| RG112              | AL123456_3 | 3859893 C             | T                 | Rv3440c | SNP   | SYNONYMOUS_CODING          | gaG/gaA             | E28       |
| RG112              | AL123456_3 | 3862472 GAA           | GA                | none    | INDEL | INTERGENIC                 |                     |           |
| RG112              | AL123456_3 | 3864995 T             | C                 | Rv3447c | SNP   | NON_SYNONYMOUS_CODING      | Agc/Ggc             | S1082G    |
| RG112              | AL123456_3 | 3873392 T             | G                 | Rv3451  | SNP   | NON_SYNONYMOUS_CODING      | ctG/cGc             | L259R     |
| RG112              | AL123456_3 | 3877421 A             | G                 | Rv3456c | SNP   | SYNONYMOUS_CODING          | ccT/ccC             | P4        |
| RG112              | AL123456_3 | 3883626 A             | G                 | Rv3466  | SNP   | SYNONYMOUS_CODING          | ccA/ccG             | P34       |
| RG112              | AL123456_3 | 3885886 T             | C                 | Rv3468c | SNP   | NON_SYNONYMOUS_CODING      | Atc/Gtc             | I62V      |
| RG112              | AL123456_3 | 3888690 G             | C                 | Rv3470c | SNP   | NON_SYNONYMOUS_CODING      | gCc/gGc             | A38G      |
| RG112              | AL123456_3 | 3890778 CTGA          | C                 | none    | INDEL | INTERGENIC                 |                     |           |
| RG112              | AL123456_3 | 3892671 A             | G                 | Rv3476c | SNP   | SYNONYMOUS_CODING          | gtT/gTC             | V350      |
| RG112              | AL123456_3 | 3894032 T             | A                 | none    | SNP   | INTERGENIC                 |                     |           |
| RG112              | AL123456_3 | 3894476 C             | T                 | Rv3478  | SNP   | SYNONYMOUS_CODING          | taC/taT             | Y17       |
| RG112              | AL123456_3 | 3895148 CA            | C                 | Rv3478  | INDEL | FRAME_SHIFT                | -                   | -242      |
| RG112              | AL123456_3 | 3895170 A             | G                 | Rv3478  | SNP   | NON_SYNONYMOUS_CODING      | Atg/Gtg             | M249V     |
| RG112              | AL123456_3 | 3895200 A             | G                 | Rv3478  | SNP   | NON_SYNONYMOUS_CODING      | Acc/Gcc             | T259A     |
| RG112              | AL123456_3 | 3895204 A             | G                 | Rv3478  | SNP   | NON_SYNONYMOUS_CODING      | aAc/aGc             | N260S     |
| RG112              | AL123456_3 | 3895232 A             | T                 | Rv3478  | SNP   | NON_SYNONYMOUS_CODING      | ttA/ttT             | L269F     |
| RG112              | AL123456_3 | 3896340 T             | G                 | Rv3479  | SNP   | NON_SYNONYMOUS_CODING      | cTc/cGc             | L174R     |
| RG112              | AL123456_3 | 3898408 A             | G                 | Rv3479  | SNP   | SYNONYMOUS_CODING          | gcA/gAc             | A863      |
| RG112              | AL123456_3 | 3929906 G             | C                 | Rv3507  | SNP   | NON_SYNONYMOUS_CODING      | gTt/gCt             | G1113A    |
| RG112              | AL123456_3 | 3936338 CG            | CGATG             | Rv3508  | INDEL | CODON_CHANGE_PLUS_CODON_IN | ggc/gATGgc          | G1779DG   |
| RG112              | AL123456_3 | 3942481 C             | G                 | Rv3512  | SNP   | NON_SYNONYMOUS_CODING      | gCg/gGg             | A253G     |
| RG112              | AL123456_3 | 3942640 T             | C                 | Rv3512  | SNP   | NON_SYNONYMOUS_CODING      | aTt/aCt             | I306T     |
| RG112              | AL123456_3 | 3952800 G             | A                 | Rv3516  | SNP   | NON_SYNONYMOUS_CODING      | gCg/gAc             | G86D      |
| RG112              | AL123456_3 | 3958403 A             | G                 | Rv3521  | SNP   | NON_SYNONYMOUS_CODING      | Aac/Gac             | N295D     |
| RG112              | AL123456_3 | 3959418 C             | T                 | Rv3522  | SNP   | NON_SYNONYMOUS_CODING      | aCc/aTc             | T324I     |
| ATGTTGCCGTTGCCGGTG |            |                       |                   |         |       |                            |                     |           |
| ATGTTGCCGTTGCCGGTG |            |                       |                   |         |       |                            |                     |           |
| RG112              | AL123456_3 | 3971486 TTGCCG        | CCG               | Rv3533c | INDEL | CODON_CHANGE_PLUS_CODON_IN | ttc/TCGGCAACCCGGTc  | F315SATPA |
| RG112              | AL123456_3 | 3973954 C             | T                 | Rv3535c | SNP   | NON_SYNONYMOUS_CODING      | Ggg/Agg             | G183R     |
| RG112              | AL123456_3 | 3979311 G             | T                 | Rv3539  | SNP   | NON_SYNONYMOUS_CODING      | GgA/gTA             | G418V     |
| RG112              | AL123456_3 | 3983271 T             | G                 | Rv3544c | SNP   | NON_SYNONYMOUS_CODING      | Atc/Ctc             | I292L     |
| RG112              | AL123456_3 | 3998059 AGGCGCGCGCGC  | AGGCGCGCGC        | Rv3558  | INDEL | CODON_CHANGE_PLUS_CODON_DE | ggcgcc/gcc          | AA30A     |
| RG112              | AL123456_3 | 4005607 T             | C                 | Rv3564  | SNP   | SYNONYMOUS_CODING          | Ttg/Ctg             | L121      |
| RG112              | AL123456_3 | 4014006 T             | G                 | Rv3572  | SNP   | NON_SYNONYMOUS_CODING      | Tcg/Gcg             | S166A     |
| RG112              | AL123456_3 | 4024273 T             | C                 | Rv3581c | SNP   | SYNONYMOUS_CODING          | gtA/gtG             | V25       |
| RG112              | AL123456_3 | 4026899 G             | A                 | Rv3585  | SNP   | SYNONYMOUS_CODING          | caG/caA             | Q152      |
| RG112              | AL123456_3 | 4029562 G             | C                 | Rv3587c | SNP   | SYNONYMOUS_CODING          | ccC/ccG             | P67       |
| TGCCGCGCGCGCCG     |            |                       |                   |         |       |                            |                     |           |
| TGCCGCGCGCGCCG     |            |                       |                   |         |       |                            |                     |           |
| RG112              | AL123456_3 | 4031616 GC            | G                 | Rv3590c | INDEL | CODON_CHANGE_PLUS_CODON_IN | ggT/ggCGCGCGGcT     | G508GPAA  |
| RG112              | AL123456_3 | 4034827 C             | T                 | Rv3593  | SNP   | NON_SYNONYMOUS_CODING      | gCg/gTg             | A159V     |
| RG112              | AL123456_3 | 4035750 C             | G                 | none    | SNP   | INTERGENIC                 |                     |           |
| RG112              | AL123456_3 | 4037283 T             | G                 | Rv3595c | SNP   | SYNONYMOUS_CODING          | ggA/ggC             | G256      |
| RG112              | AL123456_3 | 4038287 G             | A                 | Rv3596c | SNP   | SYNONYMOUS_CODING          | aaC/aaT             | N806      |
| RG112              | AL123456_3 | 4053050 A             | G                 | Rv3611  | SNP   | NON_SYNONYMOUS_CODING      | aAc/aGc             | N345      |
| RG112              | AL123456_3 | 4055801 G             | A                 | Rv3616c | SNP   | NON_SYNONYMOUS_CODING      | aCc/aTc             | T192I     |
| RG112              | AL123456_3 | 4059904 A             | G                 | none    | SNP   | INTERGENIC                 |                     |           |
| RG112              | AL123456_3 | 4060210 T             | A                 | Rv3619c | SNP   | NON_SYNONYMOUS_CODING      | cAg/cTg             | Q20L      |
| RG112              | AL123456_3 | 4060230 G             | A                 | Rv3619c | SNP   | SYNONYMOUS_CODING          | caC/caT             | H13       |
| RG112              | AL123456_3 | 4069292 G             | A                 | Rv3630  | SNP   | NON_SYNONYMOUS_CODING      | Gcc/Acc             | A40T      |
| RG112              | AL123456_3 | 4075957 C             | A                 | Rv3636  | SNP   | NON_SYNONYMOUS_CODING      | gCc/gAc             | A69D      |
| RG112              | AL123456_3 | 4088346 G             | A                 | Rv3648c | SNP   | SYNONYMOUS_CODING          | acC/acT             | T62       |
| RG112              | AL123456_3 | 4093879 TGGGGG        | TGGGGG            | Rv3652  | INDEL | FRAME_SHIFT                | -                   | -85       |
| RG112              | AL123456_3 | 4095001 CG            | C                 | Rv3655c | INDEL | FRAME_SHIFT                | -                   | -100      |
| RG112              | AL123456_3 | 4100975 T             | C                 | none    | SNP   | INTERGENIC                 |                     |           |
| RG112              | AL123456_3 | 4109895 G             | A                 | Rv3668c | SNP   | NON_SYNONYMOUS_CODING      | aCc/aTc             | T196I     |
| RG112              | AL123456_3 | 4111303 G             | C                 | Rv3669  | SNP   | SYNONYMOUS_CODING          | gtG/gCt             | V159      |
| RG112              | AL123456_3 | 4131040 C             | T                 | Rv3689  | SNP   | SYNONYMOUS_CODING          | ggC/gCt             | A228      |
| RG112              | AL123456_3 | 4135112 G             | A                 | Rv3693  | SNP   | NON_SYNONYMOUS_CODING      | atG/aTA             | M129I     |

|       |            |         |      |         |         |       |                       |         |        |
|-------|------------|---------|------|---------|---------|-------|-----------------------|---------|--------|
| RG112 | AL123456_3 | 4156099 | C    | A       | Rv3711c | SNP   | NON_SYNONYMOUS_CODING | Gtg/Ttg | V211L  |
| RG112 | AL123456_3 | 4161935 | G    | T       | Rv3718c | SNP   | SYNONYMOUS_CODING     | acC/acA | T108   |
| RG112 | AL123456_3 | 4162339 | A    | G       | Rv3719  | SNP   | NON_SYNONYMOUS_CODING | Acg/Gcg | T12A   |
| RG112 | AL123456_3 | 4163944 | A    | G       | Rv3720  | SNP   | NON_SYNONYMOUS_CODING | cAt/cGt | H70R   |
| RG112 | AL123456_3 | 4167796 | G    | A       | Rv3722c | SNP   | SYNONYMOUS_CODING     | tcC/tCT | S111   |
| RG112 | AL123456_3 | 4171828 | G    | A       | Rv3726  | SNP   | SYNONYMOUS_CODING     | ccG/ccA | P136   |
| RG112 | AL123456_3 | 4174564 | T    | C       | Rv3727  | SNP   | NON_SYNONYMOUS_CODING | aTc/aCc | I537T  |
| RG112 | AL123456_3 | 4182695 | G    | A       | Rv3731  | SNP   | NON_SYNONYMOUS_CODING | cGc/cAc | R313H  |
| RG112 | AL123456_3 | 4187485 | T    | C       | Rv3736  | SNP   | SYNONYMOUS_CODING     | gCT/gCC | A284   |
| RG112 | AL123456_3 | 4187817 | A    | G       | Rv3737  | SNP   | NON_SYNONYMOUS_CODING | gAt/gGT | D40G   |
| RG112 | AL123456_3 | 4187873 | T    | C       | Rv3737  | SNP   | SYNONYMOUS_CODING     | Ttg/Ctg | L59    |
| RG112 | AL123456_3 | 4197138 | CTT  | CTTT    | none    | INDEL | INTERGENIC            |         |        |
| RG112 | AL123456_3 | 4204441 | A    | G       | Rv3759c | SNP   | SYNONYMOUS_CODING     | caT/caC | H311   |
| RG112 | AL123456_3 | 4204511 | A    | G       | Rv3759c | SNP   | NON_SYNONYMOUS_CODING | gTg/gCG | V288A  |
| RG112 | AL123456_3 | 4210274 | A    | G       | Rv3764c | SNP   | NON_SYNONYMOUS_CODING | Tgt/Cgt | C246R  |
| RG112 | AL123456_3 | 4216856 | A    | T       | none    | SNP   | INTERGENIC            |         |        |
| RG112 | AL123456_3 | 4220174 | G    | A       | Rv3775  | SNP   | NON_SYNONYMOUS_CODING | Gac/Aac | D164N  |
| RG112 | AL123456_3 | 4221490 | C    | G       | Rv3776  | SNP   | SYNONYMOUS_CODING     | ctC/ctG | L134   |
| RG112 | AL123456_3 | 4222073 | A    | G       | Rv3776  | SNP   | NON_SYNONYMOUS_CODING | Atg/Gtg | M329V  |
| RG112 | AL123456_3 | 4222882 | A    | G       | Rv3777  | SNP   | SYNONYMOUS_CODING     | ctA/ctG | L63    |
| RG112 | AL123456_3 | 4224784 | C    | T       | Rv3778c | SNP   | NON_SYNONYMOUS_CODING | Gtg/Atg | V38M   |
| RG112 | AL123456_3 | 4232399 | G    | A       | Rv3786c | SNP   | NON_SYNONYMOUS_CODING | aCc/aTc | T100I  |
| RG112 | AL123456_3 | 4242643 | C    | T       | Rv3793  | SNP   | SYNONYMOUS_CODING     | cgC/cgT | R927   |
| RG112 | AL123456_3 | 4249447 | G    | A       | Rv3795  | SNP   | SYNONYMOUS_CODING     | gtG/gtA | V978   |
| RG112 | AL123456_3 | 4255922 | A    | G       | Rv3799c | SNP   | SYNONYMOUS_CODING     | caT/caC | H9     |
| RG112 | AL123456_3 | 4257220 | A    | G       | Rv3800c | SNP   | SYNONYMOUS_CODING     | cgT/cgC | R1309  |
| RG112 | AL123456_3 | 4264219 | T    | G       | Rv3802c | SNP   | SYNONYMOUS_CODING     | ggA/ggC | G49    |
| RG112 | AL123456_3 | 4264868 | A    | G       | Rv3803c | SNP   | NON_SYNONYMOUS_CODING | Tgg/Cgg | W199R  |
| RG112 | AL123456_3 | 4281731 | A    | G       | Rv3817  | SNP   | NON_SYNONYMOUS_CODING | Aac/Gac | N29D   |
| RG112 | AL123456_3 | 4281849 | G    | C       | Rv3817  | SNP   | NON_SYNONYMOUS_CODING | tGg/tGt | W68S   |
| RG112 | AL123456_3 | 4299480 | G    | A       | Rv3825c | SNP   | SYNONYMOUS_CODING     | tcC/tCT | S42    |
| RG112 | AL123456_3 | 4302036 | T    | C       | Rv3827c | SNP   | NON_SYNONYMOUS_CODING | Acg/Gcg | T252A  |
| RG112 | AL123456_3 | 4306155 | C    | T       | Rv3831  | SNP   | SYNONYMOUS_CODING     | agC/agT | S133   |
| RG112 | AL123456_3 | 4307179 | G    | A       | Rv3833  | SNP   | NON_SYNONYMOUS_CODING | Gtc/Atc | V105I  |
| RG112 | AL123456_3 | 4315384 | T    | C       | Rv3842c | SNP   | NON_SYNONYMOUS_CODING | gAc/gGc | D60G   |
| RG112 | AL123456_3 | 4316046 | A    | G       | Rv3843c | SNP   | NON_SYNONYMOUS_CODING | gTc/gCc | V184A  |
| RG112 | AL123456_3 | 4320050 | A    | G       | none    | SNP   | INTERGENIC            |         |        |
| RG112 | AL123456_3 | 4338595 | GC   | G       | none    | INDEL | INTERGENIC            |         |        |
| RG112 | AL123456_3 | 4338732 | G    | A       | none    | SNP   | INTERGENIC            |         |        |
| RG112 | AL123456_3 | 4340330 | T    | G       | Rv3864  | SNP   | NON_SYNONYMOUS_CODING | Ttg/Gtg | L21V   |
| RG112 | AL123456_3 | 4351039 | G    | T       | Rv3872  | SNP   | STOP_GAINED           | Gaa/Taa | E99*   |
| RG112 | AL123456_3 | 4356110 | G    | C       | Rv3877  | SNP   | SYNONYMOUS_CODING     | ctG/ctC | L368   |
| RG112 | AL123456_3 | 4363069 | T    | C       | Rv3882c | SNP   | NON_SYNONYMOUS_CODING | Atc/Gtc | I118V  |
| RG112 | AL123456_3 | 4366272 | G    | C       | Rv3884c | SNP   | SYNONYMOUS_CODING     | gcc/gcG | A189   |
| RG112 | AL123456_3 | 4368772 | A    | C       | Rv3886c | SNP   | NON_SYNONYMOUS_CODING | Tcg/Gcg | S467A  |
| RG112 | AL123456_3 | 4373496 | C    | G       | Rv3889c | SNP   | SYNONYMOUS_CODING     | gtG/gtC | V45    |
| RG112 | AL123456_3 | 4375628 | G    | T       | Rv3892c | SNP   | NON_SYNONYMOUS_CODING | aCc/aAg | T19K   |
| RG112 | AL123456_3 | 4376098 | G    | A       | none    | SNP   | INTERGENIC            |         |        |
| RG112 | AL123456_3 | 4378181 | G    | C       | Rv3894c | SNP   | NON_SYNONYMOUS_CODING | Caa/Gaa | Q758E  |
| RG112 | AL123456_3 | 4379680 | C    | G       | Rv3894c | SNP   | NON_SYNONYMOUS_CODING | cGc/cCc | R258P  |
| RG112 | AL123456_3 | 4382054 | T    | C       | Rv3896c | SNP   | SYNONYMOUS_CODING     | gcA/gcG | A266   |
| RG112 | AL123456_3 | 4382275 | G    | T       | Rv3896c | SNP   | NON_SYNONYMOUS_CODING | Caa/Aaa | Q193K  |
| RG112 | AL123456_3 | 4383144 | CC   | CCGGGGC | Rv3897c | INDEL | FRAME_SHIFT           | -/GCCCC | -165A? |
| RG112 | AL123456_3 | 4385530 | G    | C       | Rv3900c | SNP   | NON_SYNONYMOUS_CODING | cCa/cGa | P260R  |
| RG112 | AL123456_3 | 4390753 | C    | G       | Rv3905c | SNP   | SYNONYMOUS_CODING     | tcG/tcC | S93    |
| RG112 | AL123456_3 | 4391553 | C    | T       | Rv3906c | SNP   | SYNONYMOUS_CODING     | ccG/ccA | P18    |
| RG112 | AL123456_3 | 4398952 | G    | A       | Rv3910  | SNP   | NON_SYNONYMOUS_CODING | Gtc/Atc | V786I  |
| RG112 | AL123456_3 | 4400660 | ACCC | ACC     | Rv3911  | INDEL | FRAME_SHIFT           | -       | -160   |
| RG112 | AL123456_3 | 4401536 | G    | A       | Rv3912  | SNP   | NON_SYNONYMOUS_CODING | Gcg/Acg | A223T  |
| RG112 | AL123456_3 | 4404109 | A    | G       | Rv3915  | SNP   | SYNONYMOUS_CODING     | caA/caG | Q306   |
| RG112 | AL123456_3 | 4406017 | G    | C       | Rv3917c | SNP   | NON_SYNONYMOUS_CODING | Cag/Gag | Q159E  |
| RG112 | AL123456_3 | 4408156 | A    | C       | Rv3919c | SNP   | NON_SYNONYMOUS_CODING | cTt/cGt | L16R   |



















|          |            |                |         |         |       |                       |          |        |
|----------|------------|----------------|---------|---------|-------|-----------------------|----------|--------|
| RG621257 | AL123456_3 | 4187873 T      | C       | Rv3737  | SNP   | SYNONYMOUS_CODING     | Ttg/Ctg  | L59    |
| RG621257 | AL123456_3 | 4197138 CTT    | CTTT    | none    | INDEL | INTERGENIC            |          |        |
| RG621257 | AL123456_3 | 4198611 CGGGGG | CGGGG   | none    | INDEL | INTERGENIC            |          |        |
| RG621257 | AL123456_3 | 4204441 A      | G       | Rv3759c | SNP   | SYNONYMOUS_CODING     | caT/caC  | H311   |
| RG621257 | AL123456_3 | 4204511 A      | G       | Rv3759c | SNP   | NON_SYNONYMOUS_CODING | gTg/gCg  | V288A  |
| RG621257 | AL123456_3 | 4210274 A      | G       | Rv3764c | SNP   | NON_SYNONYMOUS_CODING | TgT/Cgt  | C246R  |
| RG621257 | AL123456_3 | 4216856 A      | T       | none    | SNP   | INTERGENIC            |          |        |
| RG621257 | AL123456_3 | 4220174 G      | A       | Rv3775  | SNP   | NON_SYNONYMOUS_CODING | Gac/Aac  | D164N  |
| RG621257 | AL123456_3 | 4221490 C      | G       | Rv3776  | SNP   | SYNONYMOUS_CODING     | ctC/ctG  | L134   |
| RG621257 | AL123456_3 | 4222073 A      | G       | Rv3776  | SNP   | NON_SYNONYMOUS_CODING | Atg/Gtg  | M329V  |
| RG621257 | AL123456_3 | 4222882 A      | G       | Rv3777  | SNP   | SYNONYMOUS_CODING     | ctA/ctG  | L63    |
| RG621257 | AL123456_3 | 4224784 C      | T       | Rv3778c | SNP   | NON_SYNONYMOUS_CODING | Gtg/Atg  | V38M   |
| RG621257 | AL123456_3 | 4233299 G      | A       | Rv3786c | SNP   | NON_SYNONYMOUS_CODING | aCc/aTc  | T100I  |
| RG621257 | AL123456_3 | 4242643 C      | T       | Rv3793  | SNP   | SYNONYMOUS_CODING     | cgC/cgT  | R927   |
| RG621257 | AL123456_3 | 4249447 G      | A       | Rv3795  | SNP   | SYNONYMOUS_CODING     | gtG/ctA  | V978   |
| RG621257 | AL123456_3 | 4255922 A      | G       | Rv3799c | SNP   | SYNONYMOUS_CODING     | caT/caC  | H9     |
| RG621257 | AL123456_3 | 4257220 A      | G       | Rv3800c | SNP   | SYNONYMOUS_CODING     | cgT/cgC  | R1309  |
| RG621257 | AL123456_3 | 4264868 A      | G       | Rv3803c | SNP   | NON_SYNONYMOUS_CODING | Tgg/Ggg  | W199R  |
| RG621257 | AL123456_3 | 4275025 T      | C       | Rv3811  | SNP   | SYNONYMOUS_CODING     | ggT/ggC  | G76    |
| RG621257 | AL123456_3 | 4281731 A      | G       | Rv3817  | SNP   | NON_SYNONYMOUS_CODING | Aac/Gac  | N29D   |
| RG621257 | AL123456_3 | 4281849 G      | C       | Rv3817  | SNP   | NON_SYNONYMOUS_CODING | tGg/tGg  | W68S   |
| RG621257 | AL123456_3 | 4293072 G      | A       | Rv3824c | SNP   | NON_SYNONYMOUS_CODING | Ctt/Ttt  | L35F   |
| RG621257 | AL123456_3 | 4299480 G      | A       | Rv3825c | SNP   | SYNONYMOUS_CODING     | tcT/tcT  | S42    |
| RG621257 | AL123456_3 | 4302036 T      | C       | Rv3827c | SNP   | NON_SYNONYMOUS_CODING | Acg/Gcg  | T252A  |
| RG621257 | AL123456_3 | 4306155 C      | T       | Rv3831  | SNP   | SYNONYMOUS_CODING     | agC/agT  | S133   |
| RG621257 | AL123456_3 | 4307179 G      | A       | Rv3833  | SNP   | NON_SYNONYMOUS_CODING | Gtc/Atc  | V105I  |
| RG621257 | AL123456_3 | 4315384 T      | C       | Rv3842c | SNP   | NON_SYNONYMOUS_CODING | gAc/gGc  | D60G   |
| RG621257 | AL123456_3 | 4316046 A      | G       | Rv3843c | SNP   | NON_SYNONYMOUS_CODING | gTc/gCc  | V184A  |
| RG621257 | AL123456_3 | 4320050 A      | G       | none    | SNP   | INTERGENIC            |          |        |
| RG621257 | AL123456_3 | 4336090 A      | AT      | none    | INDEL | INTERGENIC            |          |        |
| RG621257 | AL123456_3 | 4338732 G      | A       | none    | SNP   | INTERGENIC            |          |        |
| RG621257 | AL123456_3 | 4340330 T      | G       | Rv3864  | SNP   | NON_SYNONYMOUS_CODING | Ttg/Gtg  | L21V   |
| RG621257 | AL123456_3 | 4351039 G      | T       | Rv3872  | SNP   | STOP_GAINED           | Gaa/Taa  | E99*   |
| RG621257 | AL123456_3 | 4356110 G      | C       | Rv3877  | SNP   | SYNONYMOUS_CODING     | ctC/ctC  | L368   |
| RG621257 | AL123456_3 | 4363069 T      | C       | Rv3882c | SNP   | NON_SYNONYMOUS_CODING | Atc/Gtc  | I118V  |
| RG621257 | AL123456_3 | 4366272 G      | C       | Rv3884c | SNP   | SYNONYMOUS_CODING     | gcC/gcG  | A189   |
| RG621257 | AL123456_3 | 4368772 A      | C       | Rv3886c | SNP   | NON_SYNONYMOUS_CODING | Tcg/Gcg  | S467A  |
| RG621257 | AL123456_3 | 4373496 C      | G       | Rv3889c | SNP   | SYNONYMOUS_CODING     | gtG/gtC  | V45    |
| RG621257 | AL123456_3 | 4375628 G      | T       | Rv3892c | SNP   | NON_SYNONYMOUS_CODING | aCg/aAg  | T19K   |
| RG621257 | AL123456_3 | 4376098 G      | A       | none    | SNP   | INTERGENIC            |          |        |
| RG621257 | AL123456_3 | 4378181 G      | C       | Rv3894c | SNP   | NON_SYNONYMOUS_CODING | Caa/Gaa  | Q758E  |
| RG621257 | AL123456_3 | 4379680 C      | G       | Rv3894c | SNP   | NON_SYNONYMOUS_CODING | cGc/cCc  | R258P  |
| RG621257 | AL123456_3 | 4382054 T      | C       | Rv3896c | SNP   | SYNONYMOUS_CODING     | gcA/gcG  | A266   |
| RG621257 | AL123456_3 | 4383144 CC     | CCGGGGC | Rv3897c | INDEL | FRAME_SHIFT           | -/GCCCC  | -165A? |
| RG621257 | AL123456_3 | 4385530 G      | C       | Rv3900c | SNP   | NON_SYNONYMOUS_CODING | cCa/ccGa | P260R  |
| RG621257 | AL123456_3 | 4390753 C      | G       | Rv3905c | SNP   | SYNONYMOUS_CODING     | tcG/tcC  | S93    |
| RG621257 | AL123456_3 | 4391553 C      | T       | Rv3906c | SNP   | SYNONYMOUS_CODING     | ccG/ccA  | P18    |
| RG621257 | AL123456_3 | 4398952 G      | A       | Rv3910  | SNP   | NON_SYNONYMOUS_CODING | GtC/Atc  | V786I  |
| RG621257 | AL123456_3 | 4400660 ACCC   | ACC     | Rv3911  | INDEL | FRAME_SHIFT           | -        | -160   |
| RG621257 | AL123456_3 | 4401536 G      | A       | Rv3912  | SNP   | NON_SYNONYMOUS_CODING | Gcg/Acg  | A223T  |
| RG621257 | AL123456_3 | 4404109 A      | G       | Rv3915  | SNP   | SYNONYMOUS_CODING     | caA/caG  | Q306   |
| RG621257 | AL123456_3 | 4406017 G      | C       | Rv3917c | SNP   | NON_SYNONYMOUS_CODING | CaG/Gag  | Q159E  |
| RG621257 | AL123456_3 | 4408156 A      | C       | Rv3919c | SNP   | NON_SYNONYMOUS_CODING | cTt/cGt  | L16R   |

**Supplementary Table 4.** Genotyping of isolated initially classified as *Mycobacterium pinnipedii* by Spoligotyping.

| Strain <sup>a</sup>                  | INH | RIF | EMB | SM | Octonal Spoligotyping | <i>fbpC</i> <sup>183</sup> | RD9 | TbD1 | <i>pks15/1</i> deletion | RD <sup>Rio</sup> | RD174 | <i>rpoB</i> (SNPs) <sup>f</sup> | <i>rpoB</i> duplication <sup>d</sup> | <i>rpoA</i> | <i>rpoC</i> | <i>katG</i> | <i>inhA</i> | 24-loci MIRU-VNTR <sup>e</sup> | year of isolation |
|--------------------------------------|-----|-----|-----|----|-----------------------|----------------------------|-----|------|-------------------------|-------------------|-------|---------------------------------|--------------------------------------|-------------|-------------|-------------|-------------|--------------------------------|-------------------|
| 100056                               | R   | S   | S   | S  | 000000007400000       | A                          | +   | -    | 7-bp                    | -                 | -     | WT                              | WT                                   | WT          | WT          | WT          | WT          | 22431514322444212221*423       | 2010              |
| 100169                               | R   | R   | S   | S  | 000000007400000       | A                          | +   | -    | 7-bp                    | -                 | -     | GAC-GGC                         | 12pb                                 | WT          | WT          | 315 AGC-ACC | wt          | 22431514322444212221**1        | 2010              |
| 100178                               | R   | R   | S   | S  | 000000007400000       | A                          | +   | -    | 7-bp                    | -                 | -     | GAC-GGC                         | 12pb                                 | WT          | WT          | 315 AGC-ACC | wt          | 224315143224442122216423       | 2010              |
| 100285                               | R   | R   | S   | S  | 000000007400000       | A                          | +   | -    | 7-bp                    | -                 | -     | GAC-GTC                         | WT                                   | WT          | WT          | 315 AGC-ACC | T-17G       | 224315143224442122216423       | 2010              |
| 100310                               | R   | R   | S   | S  | 000000007400000       | A                          | +   | -    | 7-bp                    | -                 | -     | GAC-GGC                         | 12pb                                 | WT          | WT          | 315 AGC-ACC | wt          | 224315143224442122216423       | 2010              |
| 100094                               | R   | R   | S   | S  | 000000007400000       | A                          | +   | -    | 7-bp                    | -                 | -     | GAC-GGC                         | 12pb                                 | WT          | WT          | 315 AGC-ACC | wt          | 224315143224442122216423       | 2010              |
| RG74                                 | R   | R   | S   | S  | 000000007400000       | A                          | +   | -    | 7-bp                    | -                 | -     | GAC-GGC                         | 12pb                                 | WT          | WT          | 316 AGC-ACC | wt          | 224315143224442122216423       | 2010              |
| RG112                                | R   | R   | S   | S  | 000000007400000       | A                          | +   | -    | 7-bp                    | -                 | -     | GAC-GGC                         | 12pb                                 | WT          | WT          | 315 AGC-ACC | wt          | 224315143224442122216423       | 2010              |
| RG621257                             | R   | R   | S   | S  | 000000007400000       | A                          | +   | -    | 7-bp                    | -                 | -     | WT                              | WT                                   | WT          | WT          | 316 AGC-ACC | wt          | 224315143224442122216423       | 2006              |
| <i>M. pinnipedii</i> 76 <sup>b</sup> | ND  | ND  | ND  | ND | 074000037777600       | G                          | -   | +    | 6-bp                    | -                 | -     | ND                              | ND                                   | ND          | ND          | ND          | ND          | 316424222332341430947**2       |                   |
| <i>M. pinnipedii</i> 81 <sup>b</sup> | ND  | ND  | ND  | ND | 074000037777600       | G                          | -   | +    | 6-bp                    | -                 | -     | ND                              | ND                                   | ND          | ND          | ND          | ND          | 256324222321341'2430*4*343     |                   |

<sup>a</sup> Colony phenotype = Typical eugonic growth, buff to yellow/beige, rough wrinkled colonies, non-pigmented.

<sup>b</sup> Controls strains 76 (CA-76) and 81 (CA-81) ; kindly provided from the collection of the National Institute for Public Health and the Environment - RIVM and previously characterized by various typing methods (1, 2, 3).

<sup>c</sup> Substitution A-G and A-T at 516 at *rpoB*

<sup>d</sup> duplication of 12 nucleotides (CCA GAA CAA CCC) starting at the last nucleotide at codon 516 at *rpoB*

<sup>e</sup> MIRU2, MIRU4, MIRU10, MIRU16, MIRU20, MIRU23, MIRU24, MIRU26, MIRU27, MIRU31, MIRU39, MIRU40, MTUB04, ETR-C, ETR-A, MTUB30, MTUB39, QUB4153, QUB11, MTUB21, QUB26, MTUB29, ETR-B, MTUB34. \* = amplification failure loci.

ND = Not Determined

**Supplementary File 1** – R script used for strain classification according to the barcode system (4).

```
# This script outputs Mycobacterium tuberculosis lineage classification according to the
# molecular barcode proposed by Coll et al, Nat Comm (2014)
# The script uses as an input an eight-column (tab separated) file, in which each line
# correspond to a different genomic position (total 4411532 observations).
# Columns (and column names) should correspond to:
# Chromosome, Reference GenBank accession (NC000962.3);
# Position, genomic reference position;
# Reference, Reference Allele (GenBank Accession no. NC000962.3);
# A, Total of Adenine alleles mapped at the corresponding position;
# C, Total of Cytosine alleles mapped at the corresponding position;
# G, Total of Guanine alleles mapped at the corresponding position;
# T, Total of Thymine alleles mapped at the corresponding position;
# Total, Total fold coverage at the corresponding position.
#
# The "lineage_snps_for_classification.csv" file should be placed at the working directory or
# corresponding path below changed as appropriate.
#
# The script outputs a file comma-separated file containing the strain barcode classification.
#

lineage_snps<-read.csv("lineage_snps_for_classification.csv",header=F,sep=";")

file<-file.choose()

summary_lineage<-data.frame()

coverage_table<-read.table(file,header=T, sep="\t")

filename<-strsplit(file,"\\.")

Strain<-filename[[1]][1]

table_snps<-coverage_table[coverage_table$Position %in% lineage_snps$V2,]

a<-apply(table_snps[,4:7],MARGIN=1,FUN=which.max)

table_snps$allele<-names(table_snps[,4:7])[a]

lineage_snps2<-lineage_snps[order(lineage_snps$V2),]

lineage_snps2$class_log<-lineage_snps2$V3 == table_snps$allele

sub_table1<-lineage_snps2[lineage_snps2$class_log == c("TRUE"),]

Lineage<-max(as.vector(sub_table1$V1))

results<-data.frame(Strain,Lineage)

summary_lineage<-rbind(summary_lineage,results)
}

write.table(summary_lineage,"summary_lineage.csv",col.names=T,row.names=F,sep=";")
```

**Supplementary File 2** – CSV file *lineage\_snps\_for\_classification.csv* for use with the R script for strain classification.

lineage1;615938;A  
lineage1.1;4404247;A  
lineage1.1.1;3021283;A  
lineage1.1.1.1;3216553;A  
lineage1.1.2;2622402;A  
lineage1.1.3;1491275;A  
lineage1.2.1;3479545;A  
lineage1.2.2;3470377;T  
lineage2;497491;A  
lineage2.1;1881090;T  
lineage2.2;2505085;A  
lineage2.2.1;797736;T  
lineage2.2.1.1;4248115;T  
lineage2.2.1.2;3836274;A  
lineage2.2.2;346693;T  
lineage3;3273107;A  
lineage3.1.1;1084911;A  
lineage3.1.2;3722702;C  
lineage3.1.2.1;1237818;G  
lineage3.1.2.2;2874344;A  
lineage4;931123;T  
lineage4.1;62657;A  
lineage4.1.1;514245;T  
lineage4.1.1.1;1850119;T  
lineage4.1.1.2;541048;G  
lineage4.1.1.3;4229087;T  
lineage4.1.2;891756;G  
lineage4.1.2.1;107794;T  
lineage4.2;2411730;C  
lineage4.2.1;783601;C  
lineage4.2.2;1487796;A  
lineage4.2.2.1;1455780;C  
lineage4.3;764995;G  
lineage4.3.1;615614;A  
lineage4.3.2;4316114;A  
lineage4.3.2.1;3388166;G  
lineage4.3.3;403364;A  
lineage4.3.4;3977226;A  
lineage4.3.4.1;4398141;A  
lineage4.3.4.2;1132368;T  
lineage4.3.4.2.1;1502120;A  
lineage4.4;4307886;A  
lineage4.4.1;4151558;A  
lineage4.4.1.1;355181;A  
lineage4.4.1.2;2694560;C  
lineage4.4.2;4246508;A  
lineage4.5;1719757;T  
lineage4.6;3466426;A  
lineage4.6.1;4260268;C  
lineage4.6.1.1;874787;A  
lineage4.6.1.2;1501468;C



lineage4.6.2;4125058;C  
lineage4.6.2.1;3570528;G  
lineage4.6.2.2;2875883;T  
lineage4.7;4249732;G  
lineage4.8;3836739;A  
lineage4.9;1759252;G  
lineage5;1799921;A  
lineage6;1816587;G  
lineage7;1137518;A  
lineageBOV;2831482;G  
lineageBOV\_AFRI;1882180;T

## SUPPLEMENTAL REFERENCES LIST

1. **Kremer K, van Soolingen D, Frothingham R, Haas WH, Hermans PW, Martín C, Palittapongarnpim P, Plikaytis BB, Riley LW, Yakrus MA, Musser JM, van Embden JD.** 1999. Comparison of methods based on different molecular epidemiological markers for typing of *Mycobacterium tuberculosis* complex strains: interlaboratory study of discriminatory power and reproducibility. *J Clin Microbiol.* 37(8):2607-18.
2. **Huard RC, Fabre M, de Haas P, Lazzarini LCO, van Soolingen D, Cousins D, Ho JL.** 2006. Novel genetic polymorphisms that further delineate the phylogeny of the *Mycobacterium tuberculosis* complex. *J Bacteriol.* 188(12):4271–4287. doi: 10.1128/JB.01783-05.
3. **Vasconcellos SE, Huard RC, Niemann S, Kremer K, Santos AR, Suffys PN, Ho JL.** 2010. Distinct genotypic profiles of the two major clades of *Mycobacterium africanum*. *BMC Infect Dis.* 10:80. doi: 10.1186/1471-2334-10-80.
4. **Coll F, McNerney R, Guerra-Assuncao JA, Glynn JR, Perdigao J, Viveiros M, Portugal I, Pain A, Martin N, Clark TG.** 2014. A robust SNP barcode for typing *Mycobacterium tuberculosis* complex strains. *Nat Commun,* 5:4812. doi: 10.1038/ncomms5812.
